# Supplementary material for: Isolation of the elusive bisbenzimidazole Bbim3−˙ radical anion and its employment in a metal complex
Source: Royal Society of Chemistry journal article supplement (doi:10.1039/d1sc07245e), 2022-01-01
Supplement: d1sc07245e1.pdf [file d1sc07245e1.pdf]

## Supplementary Information

### **Isolation of the elusive bisbenzimidazole $\text{Bbim}^{3-\bullet}$ radical anion and its employment in a metal complex**

Florian Benner and Selvan Demir\*

Department of Chemistry, Michigan State University, 578 S Shaw Lane, East Lansing, Michigan 48824, USA

\*Correspondence to: [sdemir@chemistry.msu.edu](mailto:sdemir@chemistry.msu.edu) (S.D.)

## Table of Contents

|            |                                                                                                                                                                                                                                                                 |            |
|------------|-----------------------------------------------------------------------------------------------------------------------------------------------------------------------------------------------------------------------------------------------------------------|------------|
| <b>1.1</b> | <b>Single crystal X-ray crystallography</b>                                                                                                                                                                                                                     | <b>S3</b>  |
|            | <b>Table S1.</b> Crystallographic data and structural refinement of $(\text{Cp}^*_2\text{Y})_2(\mu\text{-Bbim}) \bullet \text{toluene}$ , <b>1</b> and $[\text{K}(\text{crypt-222})][(\text{Cp}^*_2\text{Y})_2(\mu\text{-Bbim}^*)] \bullet 3 \text{ THF}$       | S3         |
| <b>1.2</b> | <b>NMR Spectroscopy</b>                                                                                                                                                                                                                                         | <b>S4</b>  |
|            | <b>Figure S1.</b> NMR numbering scheme $(\text{Cp}^*_2\text{Y})_2(\mu\text{-Bbim})$ , <b>1</b> .                                                                                                                                                                | S4         |
|            | <b>Figure S2.</b> $^1\text{H}$ -NMR spectrum of $(\text{Cp}^*_2\text{Y})_2(\mu\text{-Bbim})$ , <b>1</b> (500 MHz, 25 °C, THF- $d_8$ )                                                                                                                           | S4         |
|            | <b>Figure S3.</b> $^{13}\text{C}$ -NMR spectrum of $(\text{Cp}^*_2\text{Y})_2(\mu\text{-Bbim})$ , <b>1</b> (125 MHz, 25 °C, THF- $d_8$ )                                                                                                                        | S5         |
|            | <b>Figure S4.</b> $^1\text{H}/^1\text{H}$ -COSY-NMR spectrum of $(\text{Cp}^*_2\text{Y})_2(\mu\text{-Bbim})$ , <b>1</b> (500 MHz, 25 °C, THF- $d_8$ )                                                                                                           | S5         |
|            | <b>Figure S5.</b> $^1\text{H}/^{13}\text{C}$ -HSQC-NMR spectrum of $(\text{Cp}^*_2\text{Y})_2(\mu\text{-Bbim})$ , <b>1</b> (500 MHz, 25 °C, THF- $d_8$ )                                                                                                        | S6         |
|            | <b>Figure S6.</b> $^1\text{H}/^{13}\text{C}$ -HMBC-NMR spectrum of $(\text{Cp}^*_2\text{Y})_2(\mu\text{-Bbim})$ , <b>1</b> (500 MHz, 25 °C, THF- $d_8$ ).                                                                                                       | S6         |
|            | <b>Figure S7.</b> NMR numbering scheme $[\text{K}(\text{crypt-222})][(\text{Cp}^*_2\text{Y})_2(\mu\text{-Bbim}^*)]$ , <b>2</b> .                                                                                                                                | S7         |
|            | <b>Figure S8.</b> Full $^1\text{H}$ -NMR spectrum of $[\text{K}(\text{crypt-222})][(\text{Cp}^*_2\text{Y})_2(\mu\text{-Bbim}^*)]$ , <b>2</b> (500 MHz, 25 °C, THF- $d_8$ ).                                                                                     | S7         |
|            | <b>Figure S9.</b> $^1\text{H}/^{13}\text{C}$ -HSQC-NMR spectrum of $[\text{K}(\text{crypt-222})][(\text{Cp}^*_2\text{Y})_2(\mu\text{-Bbim}^*)]$ , <b>2</b> (500 MHz, 25 °C, THF- $d_8$ ).                                                                       | S8         |
|            | <b>Figure S10.</b> $^1\text{H}$ -NMR spectrum of 2.2.2-cryptand for reference (500 MHz, 25 °C, benzene- $d_6$ ).                                                                                                                                                | S8         |
| <b>1.3</b> | <b>EPR Spectroscopy</b>                                                                                                                                                                                                                                         | <b>S9</b>  |
|            | <b>Figure S11.</b> Low temperature EPR spectrum of $[\text{K}(\text{crypt-222})][(\text{Cp}^*_2\text{Y})_2(\mu\text{-Bbim}^*)]$ , <b>2</b> , at 190 K, recorded in toluene at 9.439 GHz (orange), and simulated spectrum (blue).                                | S9         |
|            | <b>Figure S12.</b> Variable-temperature EPR spectra of $[\text{K}(\text{crypt-222})][(\text{Cp}^*_2\text{Y})_2(\mu\text{-Bbim}^*)]$ , <b>2</b> , (in color, Fig. 4 top), superimposed with the fits for each temperature (faded traces in gray, Fig. 4 bottom). | S9         |
| <b>1.4</b> | <b>Integration of Experimental EPR Spectra</b>                                                                                                                                                                                                                  | <b>S10</b> |
|            | <b>Figure S13.</b> Integrated derivative (left) and double-integrated (right) VT EPR spectra.                                                                                                                                                                   | S10        |
|            | <b>Table S2.</b> Values for the integrated intensity of the VT EPR experiments between 200 K and 280 K and the linewidths used to simulate the EPR spectra for <b>2</b> .                                                                                       | S11        |
| <b>1.5</b> | <b>Magnetic Measurements</b>                                                                                                                                                                                                                                    | <b>S12</b> |
|            | <b>Figure S14.</b> $\chi_M T$ vs. $T$ plots and Curie-Weiss-plots for $[\text{K}(\text{crypt-222})][(\text{Cp}^*_2\text{Y})_2(\mu\text{-Bbim}^*)]$ , <b>2</b> , and fits of the $1/\chi_M$ vs. $T$ plots to a Curie-Weiss Law at 0.5 T and 1.0 T.               | S12        |
|            | <b>Table S3.</b> Curie (C) and Weiss ( $\Theta$ ) constants obtained from fitting the $1/\chi_M$ vs. $T$ data.                                                                                                                                                  | S13        |
|            | <b>Figure S15.</b> Fits to the $\chi_M T$ vs. $T$ plots considering the intermolecular coupling term $zJ'$ and the $g$ -value 0.5 T and 1 T.                                                                                                                    | S13        |
|            | <b>Table S4.</b> Fitted $g$ -values and mean-field intermolecular interaction between spin systems ( $zJ'$ ) from fitting the $\chi_M T$ vs. $T$ plots.                                                                                                         | S13        |

|            |                                                                                                                                                                                                         |            |
|------------|---------------------------------------------------------------------------------------------------------------------------------------------------------------------------------------------------------|------------|
|            | <b>Figure S16.</b> Field-dependent magnetization ( $M$ vs. $H$ ) data and fits to a Brillouin function and reduced magnetization ( $H/T$ ) data.                                                        | S14        |
|            | <b>Table S5.</b> $g$ -Values and number of moments ( $N$ ) obtained from fitting the $M$ vs. $H$ data to a Brillouin function.                                                                          | S15        |
| <b>1.6</b> | <b>IR Spectroscopy</b>                                                                                                                                                                                  | <b>S15</b> |
|            | <b>Figure S17.</b> FTIR spectra of $(\text{Cp}^*_2\text{Y})_2(\mu\text{-Bbim})$ , <b>1</b> and $[\text{K}(\text{crypt-222})][(\text{Cp}^*_2\text{Y})_2(\mu\text{-Bbim}^*)]$ , <b>2</b> .                | S15        |
| <b>1.7</b> | <b>Cyclic Voltammetry</b>                                                                                                                                                                               | <b>S16</b> |
|            | <b>Figure S18.</b> Cyclic voltammogram of the free ligand $(\text{Li}(\text{TMEDA}))_2\text{Bbim}$ and $(\text{Cp}^*_2\text{Y})_2(\mu\text{-Bbim})$ , <b>1</b> , in dichloromethane.                    | S16        |
|            | <b>Figure S19.</b> Full cyclic voltammogram of $[\text{K}(\text{crypt-222})][(\text{Cp}^*_2\text{Y})_2(\mu\text{-Bbim}^*)]$ , <b>2</b> , in THF.                                                        | S16        |
| <b>1.8</b> | <b>DFT calculations</b>                                                                                                                                                                                 | <b>S17</b> |
|            | <b>Figure S20.</b> Numbering scheme for the structure optimizations and NLMO/spin density calculations.                                                                                                 | S17        |
|            | <b>Table S6.</b> Comparison of structural parameters of the optimized geometries of <b>2'</b> in comparison to <b>2</b> .                                                                               | S18        |
|            | <b>Table S7.</b> Comparison of bond- and dihedral angles of optimized geometries of <b>2'</b> in comparison to <b>2</b> .                                                                               | S19        |
|            | <b>Figure S21.</b> Graphical representation of the DFT optimized structures in comparison to the unoptimized structure.                                                                                 | S19        |
|            | <b>Table S8.</b> Results of the hybridization/polarization analysis of NLMOs, given as the % contributions of parent NBOs from uB3LYP calculations.                                                     | S20        |
|            | <b>Table S9.</b> Results of the second order perturbation analysis of <b>2'</b> from uB3LYP calculations.                                                                                               | S20        |
|            | <b>Table S10.</b> Results of the hybridization/polarization analysis of NLMOs, given as the % contributions of parent NBOs from uTPSS calculations.                                                     | S21        |
|            | <b>Table S11.</b> Results of the second order perturbation analysis of <b>2'</b> from uTPSS calculations.                                                                                               | S21        |
|            | <b>Table S12.</b> Mulliken spin densities for <b>2'</b> as obtained from NLMO calculations.                                                                                                             | S22        |
|            | <b>Figure S22.</b> Graphical representation of the calculated MOs of the $\alpha$ - (left) and $\beta$ -manifold (right), sorted by their relative energies.                                            | S23        |
|            | <b>Figure S23.</b> Graphical representation of the calculated N lone pair NLMOs, sorted by relative energies.                                                                                           | S24        |
|            | <b>Table S13.</b> Results of the hybridization/polarization analysis of NLMOs, given as the % contributions of parent NBOs from uB3LYP calculations on the unoptimized crystal coordinates of <b>1'</b> | S25        |
|            | <b>Table S14.</b> Results of the second order perturbation analysis of <b>2'</b> from uB3LYP calculations on the unoptimized crystal coordinates of <b>1'</b>                                           | S25        |
| <b>1.9</b> | <b>References</b>                                                                                                                                                                                       | <b>S26</b> |

## 1.1 Single crystal X-ray crystallography

**Table S1:** Crystallographic data and structural refinement of (Cp\*<sub>2</sub>Y)<sub>2</sub>(μ-Bbim) • toluene, **1** and [K(crypt-222)][(Cp\*<sub>2</sub>Y)<sub>2</sub>(μ-Bbim\*)] • 3 THF, **2**.

| Compound                                                       | <b>1</b>                                                                                   | <b>2</b>                                                                                    |
|----------------------------------------------------------------|--------------------------------------------------------------------------------------------|---------------------------------------------------------------------------------------------|
| CCDC no.                                                       | 2123273                                                                                    | 2123274                                                                                     |
| Empirical formula                                              | C <sub>61</sub> H <sub>75</sub> N <sub>4</sub> Y <sub>2</sub>                              | C <sub>84</sub> H <sub>126.5</sub> KN <sub>6</sub> O <sub>9</sub> Y <sub>2</sub>            |
| Formula weight                                                 | 1042.07                                                                                    | 1582.84                                                                                     |
| Temperature/K                                                  | 173.15                                                                                     | 100.00(10)                                                                                  |
| Crystal system                                                 | triclinic                                                                                  | triclinic                                                                                   |
| Space group                                                    | <i>P</i> -1                                                                                | <i>P</i> -1                                                                                 |
| <i>a</i> [Å]                                                   | 10.5717(10)                                                                                | 13.0300(2)                                                                                  |
| <i>b</i> [Å]                                                   | 11.0365(10)                                                                                | 18.0681(4)                                                                                  |
| <i>c</i> [Å]                                                   | 12.4271(12)                                                                                | 18.3710(3)                                                                                  |
| $\alpha$ [°]                                                   | 67.8112(11)                                                                                | 86.907(2)                                                                                   |
| $\beta$ [°]                                                    | 87.4492(12)                                                                                | 78.0500(10)                                                                                 |
| $\gamma$ [°]                                                   | 79.2874(12)                                                                                | 76.349(2)                                                                                   |
| Volume [Å <sup>3</sup> ]                                       | 1318.6(2)                                                                                  | 4111.72(13)                                                                                 |
| <i>Z</i>                                                       | 1                                                                                          | 2                                                                                           |
| $\rho_{\text{calc}}$ [g/cm <sup>3</sup> ]                      | 1.312                                                                                      | 1.278                                                                                       |
| $\mu$ [mm <sup>-1</sup> ]                                      | 2.232                                                                                      | 1.513                                                                                       |
| <i>F</i> (000)                                                 | 547.0                                                                                      | 1683.0                                                                                      |
| Crystal size [mm <sup>3</sup> ]                                | 0.245 × 0.222 × 0.122                                                                      | 0.145 × 0.119 × 0.084                                                                       |
| Radiation                                                      | MoK $\alpha$ ( $\lambda$ = 0.71073)                                                        | MoK $\alpha$ ( $\lambda$ = 0.71073)                                                         |
| 2 $\theta$ range for data collection [°]                       | 3.54 to 50.734                                                                             | 4.348 to 61.854                                                                             |
| Index ranges                                                   | -12 ≤ <i>h</i> ≤ 12, -13 ≤ <i>k</i> ≤ 13,<br>-14 ≤ <i>l</i> ≤ 14                           | -17 ≤ <i>h</i> ≤ 18, -25 ≤ <i>k</i> ≤ 22,<br>-25 ≤ <i>l</i> ≤ 25                            |
| Reflections collected                                          | 21396                                                                                      | 82579                                                                                       |
| Independent reflections                                        | 4822 [ <i>R</i> <sub>int</sub> = 0.0617, <i>R</i> <sub><math>\sigma</math></sub> = 0.0535] | 21330 [ <i>R</i> <sub>int</sub> = 0.0430, <i>R</i> <sub><math>\sigma</math></sub> = 0.0443] |
| Data/restraints/parameters                                     | 4822/0/336                                                                                 | 21330/0/966                                                                                 |
| Goodness-of-fit on <i>F</i> <sup>2</sup>                       | 1.053                                                                                      | 1.028                                                                                       |
| Final <i>R</i> indexes [ <i>I</i> > = 2 $\sigma$ ( <i>I</i> )] | <i>R</i> <sub>1</sub> = 0.0457, <i>wR</i> <sub>2</sub> = 0.1085                            | <i>R</i> <sub>1</sub> = 0.0458, <i>wR</i> <sub>2</sub> = 0.1038                             |
| Final <i>R</i> indexes [all data]                              | <i>R</i> <sub>1</sub> = 0.0616, <i>wR</i> <sub>2</sub> = 0.1170                            | <i>R</i> <sub>1</sub> = 0.0641, <i>wR</i> <sub>2</sub> = 0.1102                             |
| Largest diff. peak/hole [e Å <sup>-3</sup> ]                   | 0.90/-0.42                                                                                 | 1.60/-0.52                                                                                  |

## 1.2 NMR Spectroscopy

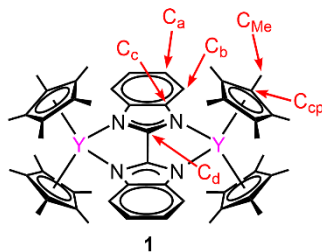

**Figure S1.** NMR numbering scheme for  $(\text{Cp}^*_2\text{Y})_2(\mu\text{-Bbim})$ , **1**.

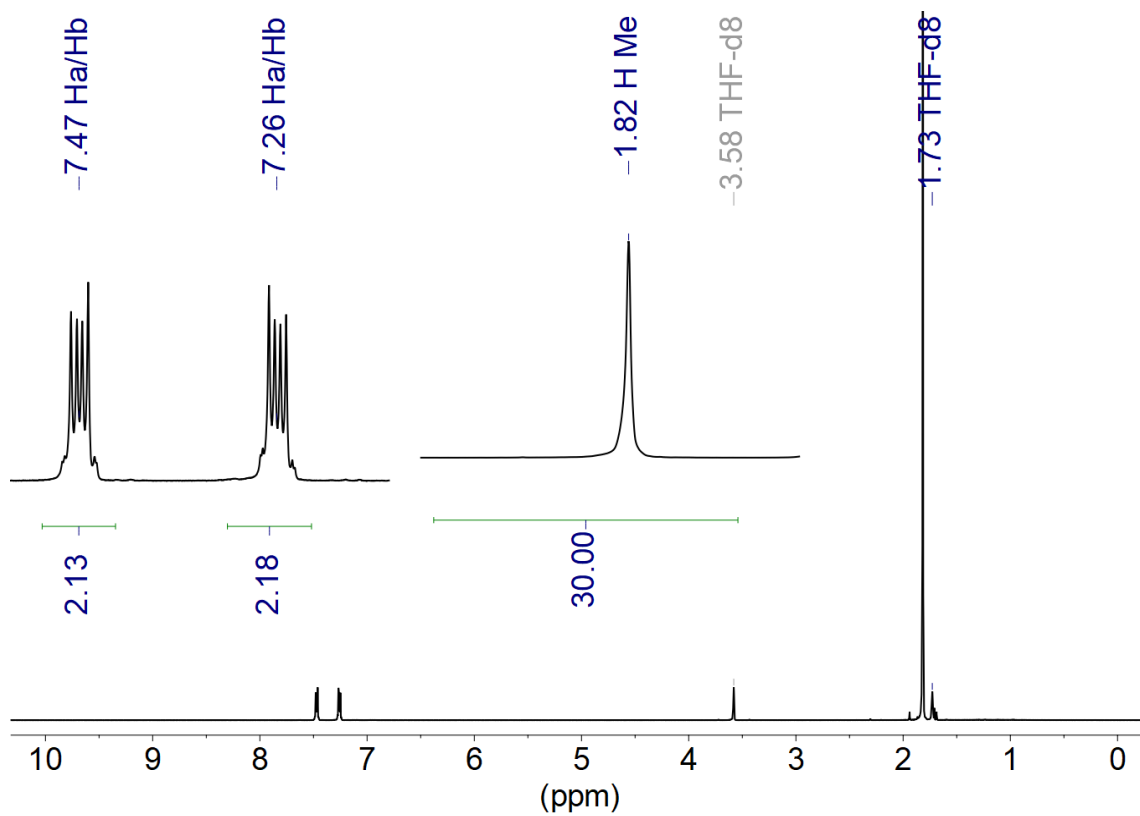

**Figure S2.**  $^1\text{H}$ -NMR spectrum of  $(\text{Cp}^*_2\text{Y})_2(\mu\text{-Bbim})$ , **1** (500 MHz, 25 °C,  $\text{THF-}d_8$ ).

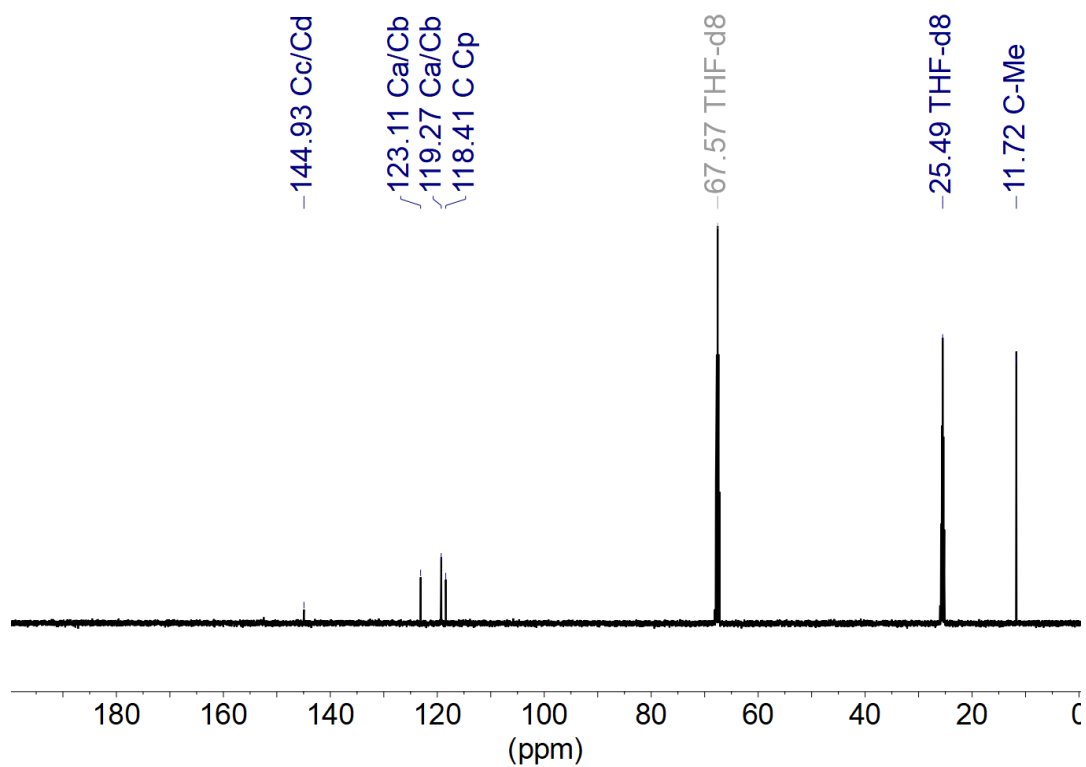

**Figure S3.**  $^{13}\text{C}$ -NMR spectrum of  $(\text{Cp}^*_2\text{Y})_2(\mu\text{-Bbim})$ , **1** (125 MHz, 25 °C,  $\text{THF-d}_8$ ).

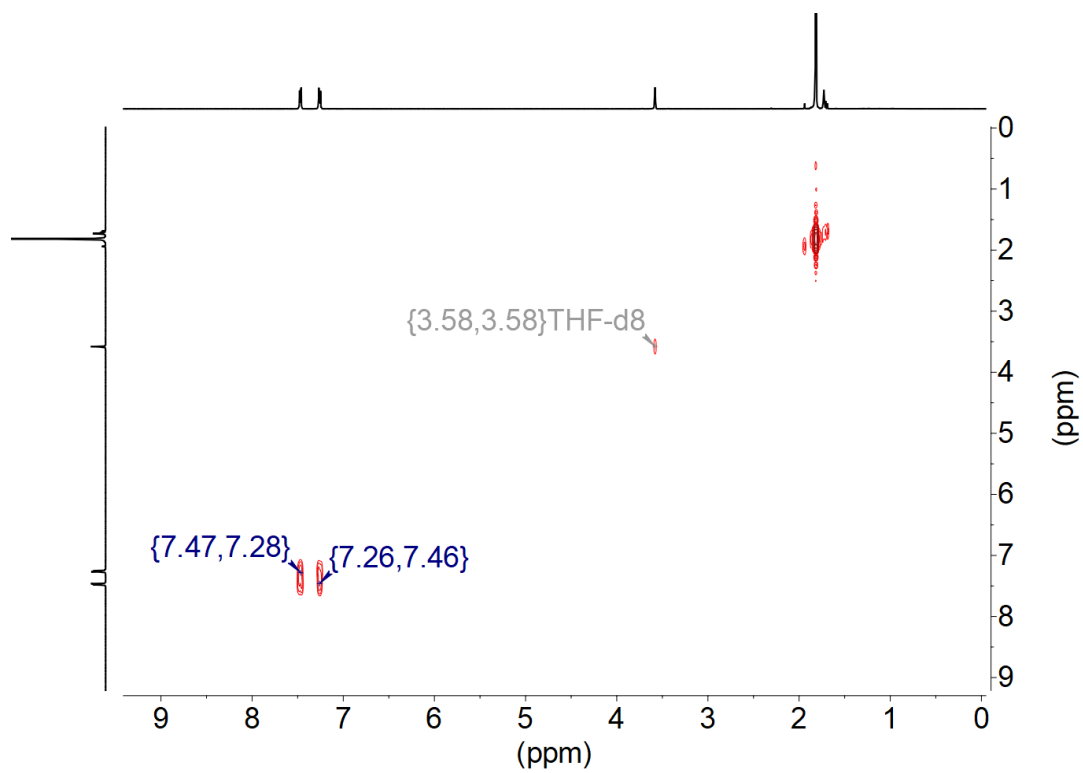

**Figure S4.**  $^1\text{H}/^1\text{H}$ -COSY-NMR spectrum of  $(\text{Cp}^*_2\text{Y})_2(\mu\text{-Bbim})$ , **1** (500 MHz, 25 °C,  $\text{THF-d}_8$ ).

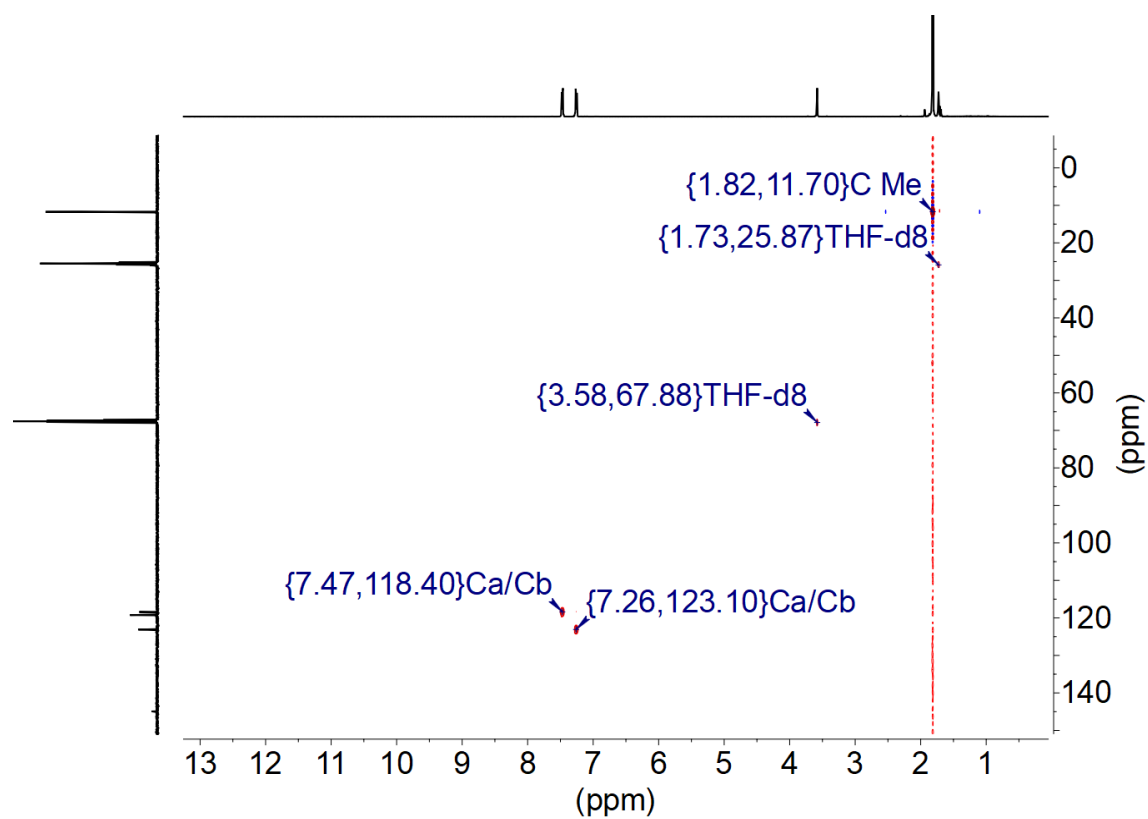

**Figure S5.**  $^1\text{H}/^{13}\text{C}$ -HSQC-NMR spectrum of  $(\text{Cp}^*_2\text{Y})_2(\mu\text{-Bbim})$ , **1** (500 MHz, 25 °C, THF- $d_8$ ).

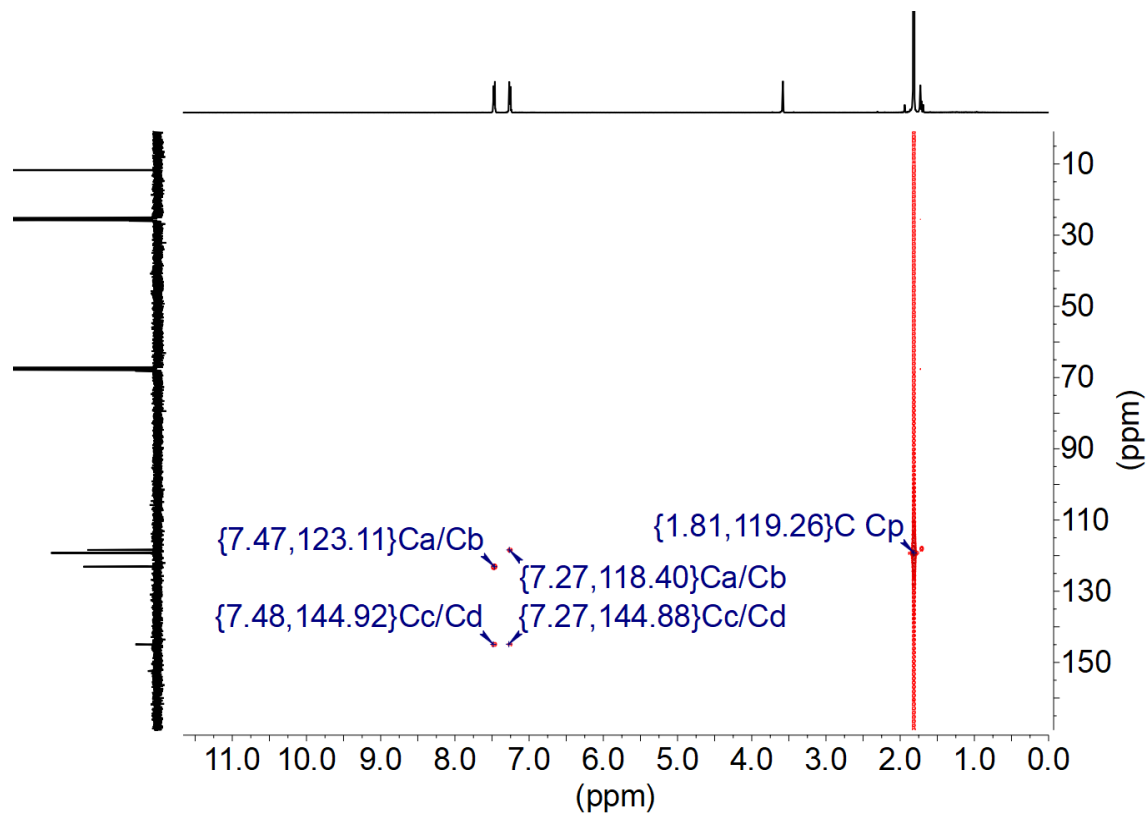

**Figure S6.**  $^1\text{H}/^{13}\text{C}$ -HMBC-NMR spectrum of  $(\text{Cp}^*_2\text{Y})_2(\mu\text{-Bbim})$ , **1** (500 MHz, 25 °C, THF- $d_8$ ).

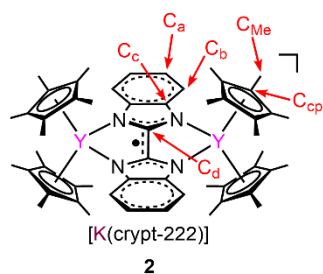

**Figure S7.** NMR numbering scheme for [K(crypt-222)][(Cp\*<sub>2</sub>Y)<sub>2</sub>(μ-Bbim\*)], **2**.

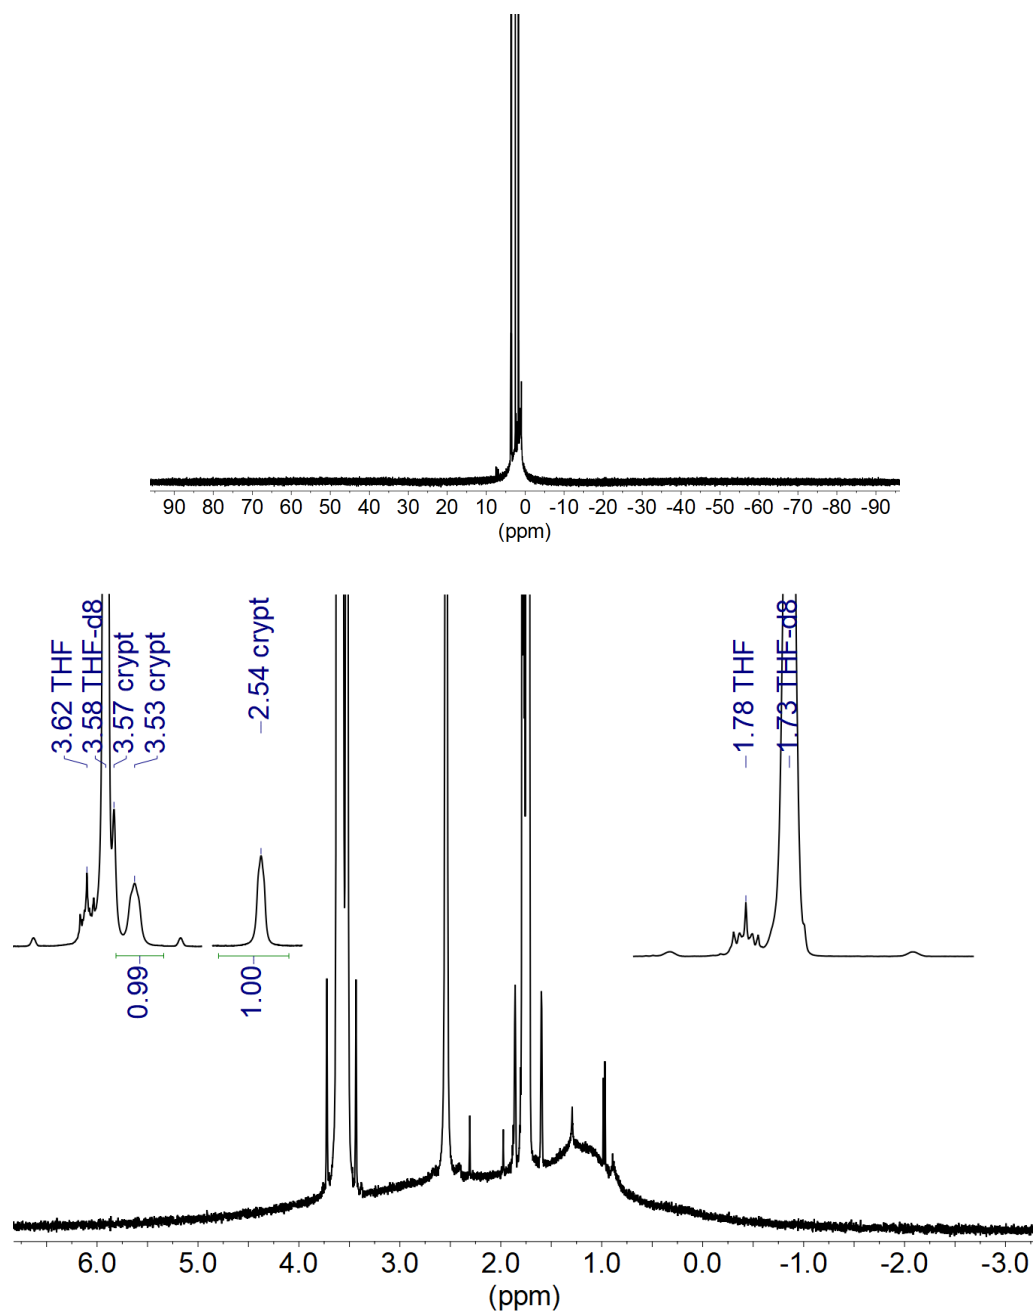

**Figure S8.** Top: Full <sup>1</sup>H-NMR spectrum of [K(crypt-222)][(Cp\*<sub>2</sub>Y)<sub>2</sub>(μ-Bbim\*)], **2** (500 MHz, 25 °C, THF-*d*<sub>8</sub>). Bottom: Magnification of the 6.5 and -3.0 ppm region.



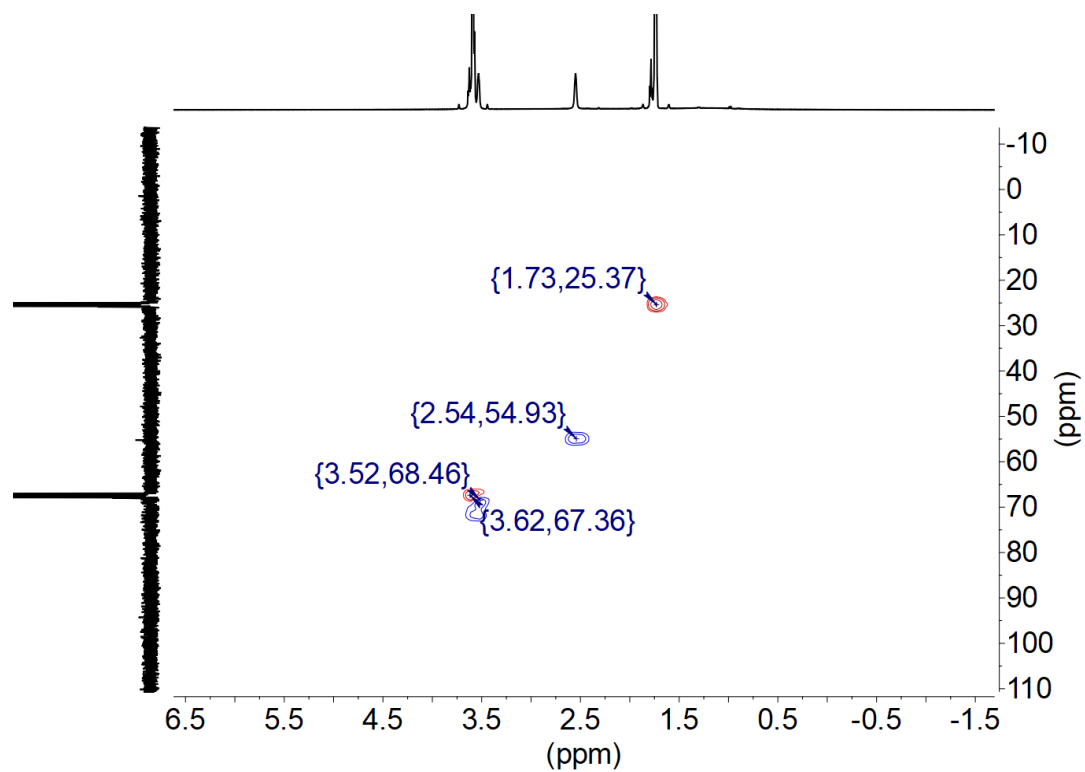

**Figure S9.**  $^1\text{H}/^{13}\text{C}$ -HSQC-NMR spectrum of  $[\text{K}(\text{crypt-222})][(\text{Cp}^*_2\text{Y})_2(\mu\text{-Bbim}^*)]$ , **2** (500 MHz, 25 °C,  $\text{THF-}d_8$ ).

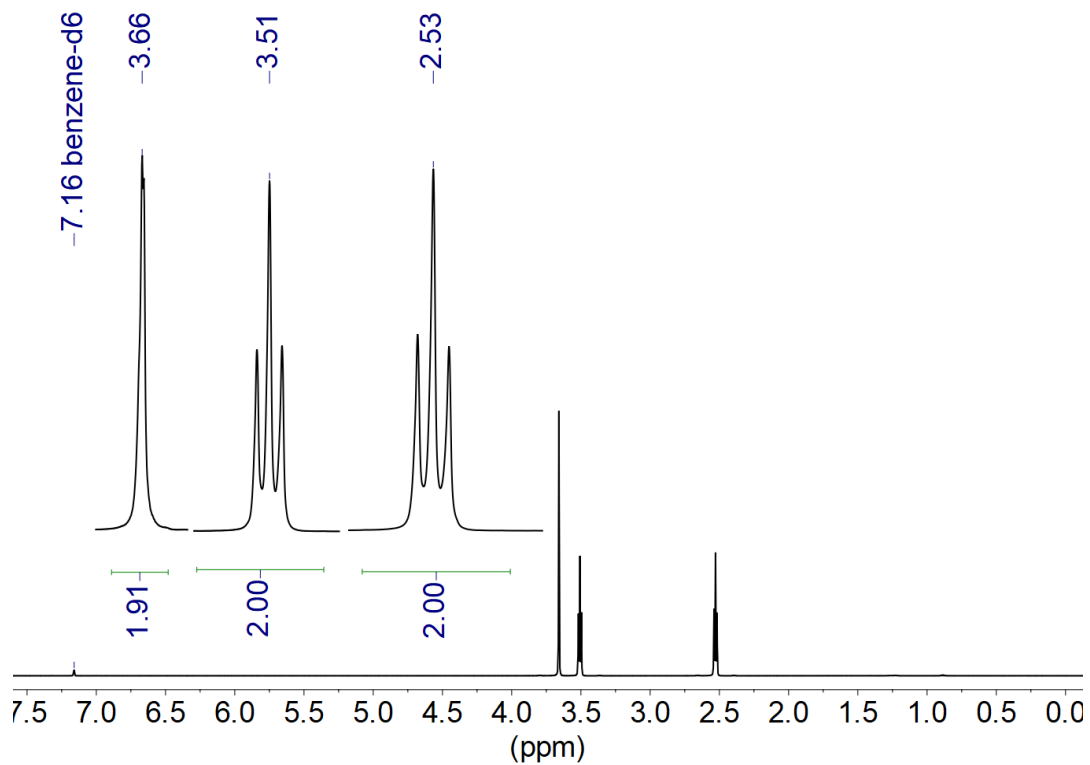

**Figure S10.**  $^1\text{H}$ -NMR spectrum of 2.2.2-cryptand for reference (500 MHz, 25 °C,  $\text{benzene-}d_6$ ).

### 1.3 EPR Spectroscopy

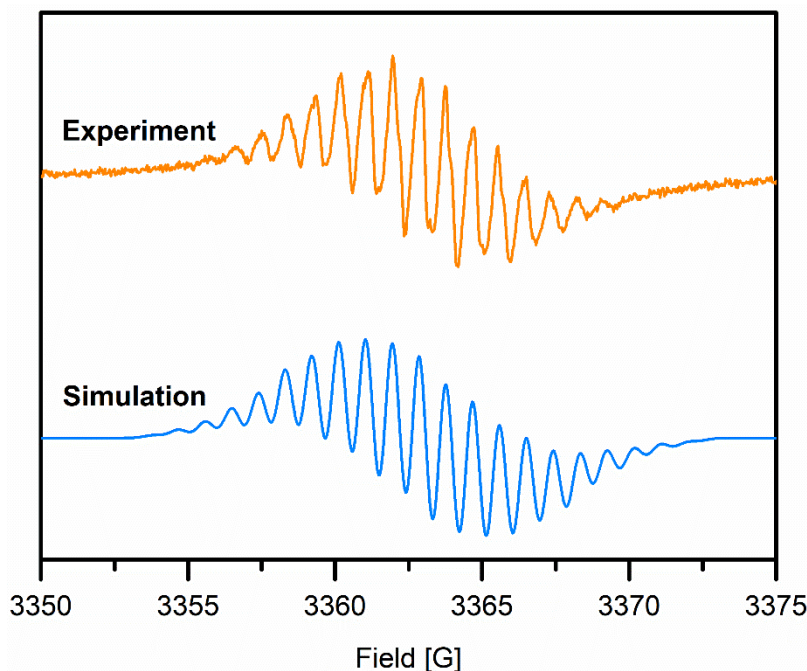

**Figure S11.** Low-temperature EPR spectrum of  $[\text{K}(\text{crypt-222})][(\text{Cp}^*_2\text{Y})_2(\mu\text{-Bbim}^*)]$ , **2**, measured at 190 K. In orange: The experimental spectrum recorded in THF at 9.439 GHz. In blue: Simulated spectrum. Simulation parameters: 4  $^{14}\text{N}$ , 4  $^1\text{H}_1$ , 4  $^1\text{H}_2$  and 2  $^{89}\text{Y}$  nuclei,  $A(^{14}\text{N}) = 5.1$  MHz,  $A_1(^1\text{H}) = 2.30$  MHz,  $A_2(^1\text{H}) = 0.54$  MHz,  $A(^{89}\text{Y}) = 0.42$  MHz),  $g = 2.00536$  (298 K), linewidth: 0.07 mT.

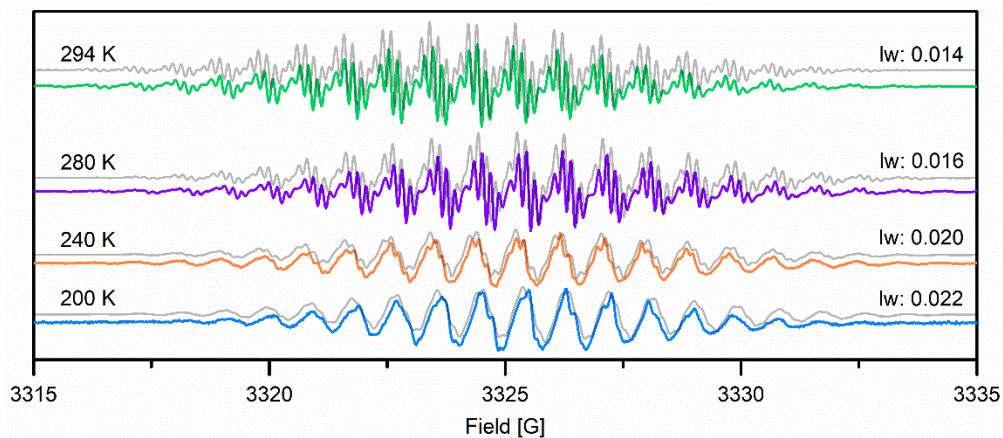

**Figure S12.** Variable-temperature EPR spectra of  $[\text{K}(\text{crypt-222})][(\text{Cp}^*_2\text{Y})_2(\mu\text{-Bbim}^*)]$ , **2**, (in color, Fig. 4 top), superimposed with the fits for each temperature (faded traces in gray, Fig. 4 bottom). The experimental spectra were recorded in THF at 9.335 GHz (200-280K) and 9.331 GHz (294 K). Simulation parameters: 4  $^{14}\text{N}$ , 4  $^1\text{H}_1$ , 4  $^1\text{H}_2$  and 2  $^{89}\text{Y}$  nuclei,  $A(^{14}\text{N}) = 5.1$  MHz,  $A_1(^1\text{H}) = 2.30$  MHz,  $A_2(^1\text{H}) = 0.54$  MHz,  $A(^{89}\text{Y}) = 0.42$  MHz),  $g = 2.00554$  (294 K), 2.00557 (280-200 K), linewidths (lw) are given in mT.

## 1.4 Integration of Experimental EPR Spectra

The experimental EPR spectra of Figure S12 can be integrated to give the integrated derivative and double-integrated VT EPR spectra in the temperature range of 200 K to 280 K, Figure S13. The absorption spectra uncover the changes in line shapes and the accompanied loss in resolution. The double-integrated EPR spectra allow for the quantification of the intensity. These spectra reveal a correlation of resolution loss and reduced signal intensity to a decline in temperature. A loss of intensity could indicate a temperature-dependent formation of radical dimers in solution, affording an EPR silent species which diminishes the overall signal intensity. Such reversible dimerization interactions have been investigated for planar aromatic radicals such as phenalenyl<sup>1</sup> and olympicenyl<sup>2</sup> radicals, where VT EPR spectroscopy enabled the determination of dimerization constants. However, this formation of EPR silent dimers would not affect the hyperfine coupling pattern of the parent complex as the EPR active monomeric species would remain unchanged. Since the hyperfine coupling pattern of **2** uniformly changes with varying temperature, it is more likely that the correlation time of the rotational diffusion becomes long enough, so that not all anisotropic contributions are averaged out (slow motion regime). The rotational correlation time  $\tau_c$  is dependent on the rotational diffusion rate constant  $R$  by  $\tau_c = 1/6R$  and, in conjunction with the rigid-limit spectral width  $\Delta\omega$ , determines the shape of a CW EPR spectrum. When  $\tau_c\Delta\omega \gg 1$ , the rotational diffusion has negligible influence on the spectrum and it resembles the one in the rigid limit ( $\tau_c \rightarrow \infty$ , solid state like), whereas when  $\tau_c\Delta\omega \leq 1$ , the motion is fast enough to average out most anisotropic contributions ( $\tau_c \rightarrow 0$ , solution state like). The intermediate regime  $1 < \tau_c\Delta\omega < 100$  is considered as the slow motion regime, where the spectrum is sensitive to rotational motion.<sup>3-5</sup> In this slow motion region, the EPR signal intensity is a complex interplay between correlation time, hyperfine coupling tensor anisotropy and the utilized magnetic field modulation amplitude. Taken together, most of the decrease in intensity observed in this experiment is attributed to a general loss in resolution due to incomplete averaging of hyperfine anisotropy. Based on the results of this measurement, the effects of a dimerization in solution cannot be entirely excluded, however, it should be noted that a dimerization is generally substantially hampered by the two coordinating Cp\* ligands per metal center. Since no additional signals emerge from the EPR spectra upon lowering the temperature, as for example observed for the phenalenyl<sup>1</sup> radical, the formation of a new EPR active dimer through  $\pi$ -stacking with a neutral  $[(Cp^*_2Y)_2(\mu-Bbim)]$  can be excluded.

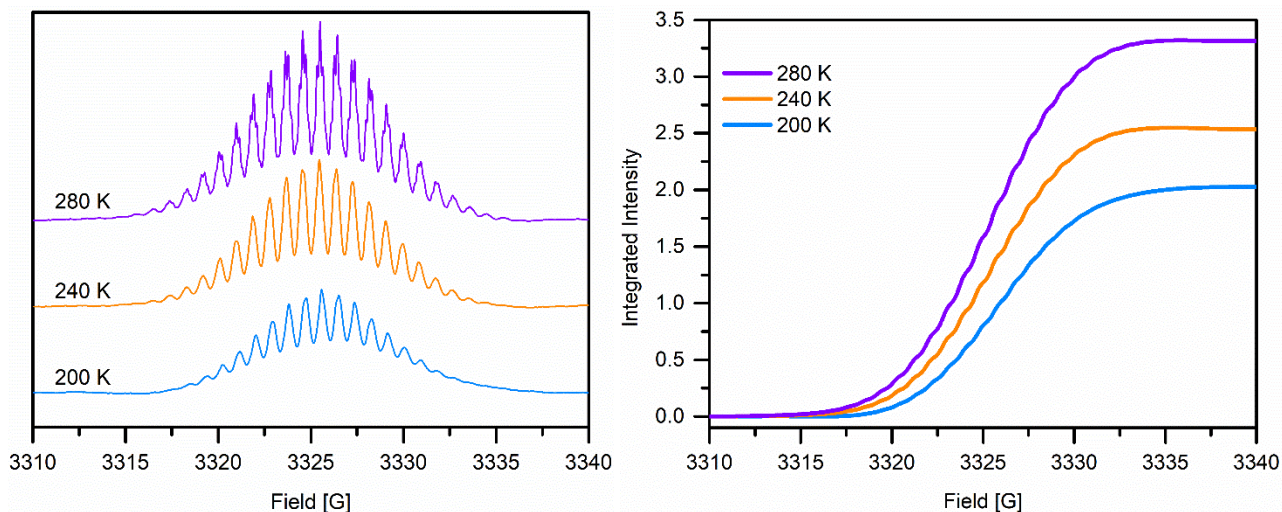

**Figure S13.** Integrated derivative (left) and double-integrated (right) VT EPR spectra at 280 K, 240 K, and 200 K, which were obtained from integrating the experimental spectra shown in Figure S12 (taken in THF at 1 mmol/L concentration).

**Table S2.** Values for the integrated intensity of the VT EPR experiments between 200 K and 280 K and the linewidths used to simulate the EPR spectra for **2** as full width at half maximum (FWHM) in mT. The intensity loss of approximately 40% by lowering the temperature from 280 K and 200 K could indicate a radical dimer formation in solution.

| Temperature (K) | Integrated Intensity | % Intensity loss vs. 280 K | Line Width (mT) |
|-----------------|----------------------|----------------------------|-----------------|
| 280             | 3.319                | 0                          | 0.016           |
| 240             | 2.548                | 23.2                       | 0.020           |
| 200             | 2.027                | 38.9                       | 0.022           |

## 1.5 Magnetic Measurements

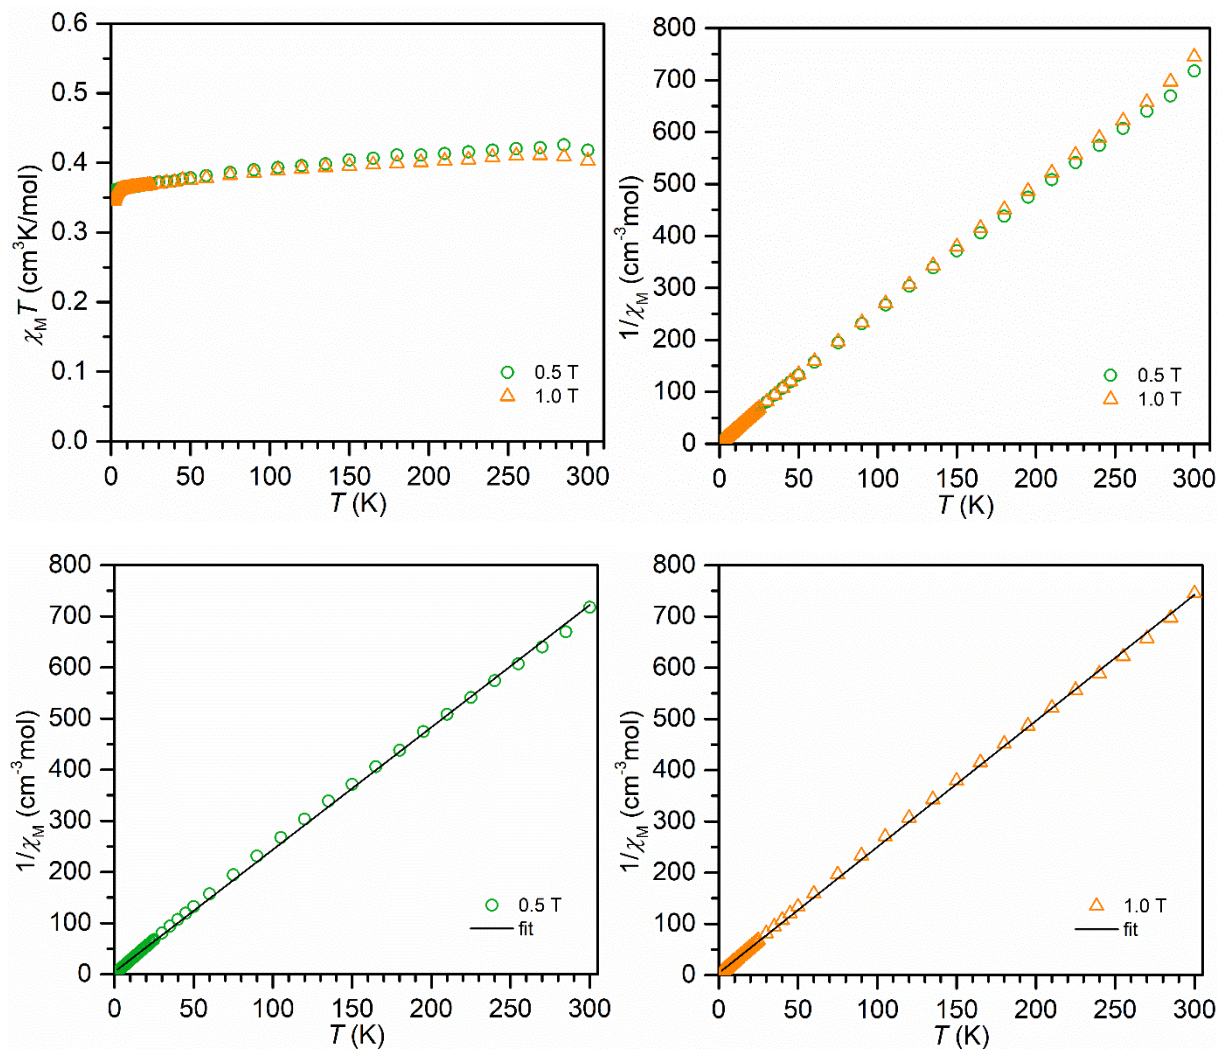

**Figure S14.** Top:  $\chi_M T$  vs.  $T$  plots (left) and Curie-Weiss-plots ( $1/\chi_M$  vs.  $T$ , right) for [K(crypt-222)][(Cp\*<sub>2</sub>Y)<sub>2</sub>( $\mu$ -Bbim\*)], **2**, obtained between 2 and 300 K under applied dc fields of 0.5 T (green circles) and 1.0 T (yellow triangles). Bottom: Fits of the  $1/\chi_M$  vs.  $T$  plots to a Curie-Weiss Law at 0.5 T (left) and 1.0 T (right). The room temperature  $\chi_M T$  values of **2** were found to be slightly higher than the expected value for one unpaired electron (0.419 cm<sup>3</sup>K/mol (0.5 T) and 0.403 cm<sup>3</sup>K/mol (0.1 T), calculated: 0.375 cm<sup>3</sup>K/mol). The Curie-Weiss plot reveals a gradual decrease in  $1/\chi_M$  upon decreasing temperatures, as expected for a paramagnetic compound. Deviations from linearity were primarily observed for the lower applied DC field (0.5 T) and are in line with the deviations observed for the room temperature  $\chi_M T$  values. Fitting the  $1/\chi_M$  values to a Curie-Weiss law revealed small negative Weiss constants, indicative of the presence of weak intermolecular antiferromagnetic coupling. These values showed a field dependence, where increasingly strong fields reduce the  $\Theta$  values. This hints at an increasing suppression of the intermolecular coupling which has been observed before for single-molecule magnets containing paramagnetic metal ions such as lanthanides, where the suppression of intermolecular magnetic coupling was found to alter relaxation dynamics upon the application of an external magnetic field.<sup>6</sup>



**Table S3.** Curie (C) and Weiss ( $\Theta$ ) constants obtained from fitting the  $1/\chi_M$  vs. T data to a Curie-Weiss Law ( $1/\chi_M = (T - \Theta)/C$ ) with squared errors ( $R^2$ ) as indication for the goodness of the fits.

| Field (T) | C (cm <sup>3</sup> K/mol) | $\Theta$ (K) | $R^2$   |
|-----------|---------------------------|--------------|---------|
| 0.5       | 0.418                     | -1.897       | 0.99932 |
| 1.0       | 0.406                     | -1.492       | 0.99962 |

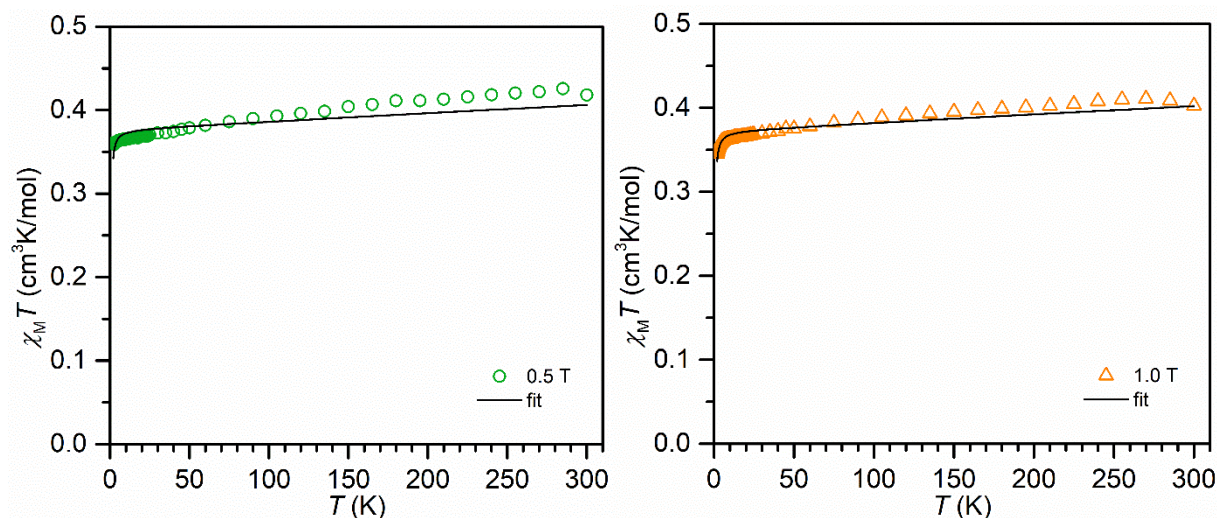

**Figure S15.** Fits to the  $\chi_M T$  vs. T plots considering the intermolecular coupling term  $zJ'$  and the  $g$ -value (left (0.5 T)) and right (1 T).

**Table S4.**  $g$ -values and mean-field intermolecular interaction between spin systems ( $zJ'$ ), obtained from fitting the  $\chi_M T$  vs. T plots using the software Phi<sup>7</sup> over the entire probed temperature range (2-300 K). A small constant temperature-independent paramagnetism term (TIP) was included to attain the best fit to the  $\chi_M T$  data. Both the negative  $\Theta$  values and small negative  $zJ'$  values indicate a small intermolecular coupling between the unpaired electrons in the solid state.

| Field (T) | $zJ'$ (cm <sup>-1</sup> ) | $g$        | Residual | TIP(10 <sup>-4</sup> cm <sup>-1</sup> ) |
|-----------|---------------------------|------------|----------|-----------------------------------------|
| 0.5       | -0.088(12)                | 2.0035(28) | 0.005726 | 1                                       |
| 1.0       | -0.098(8)                 | 1.9927(17) | 0.002101 | 1                                       |

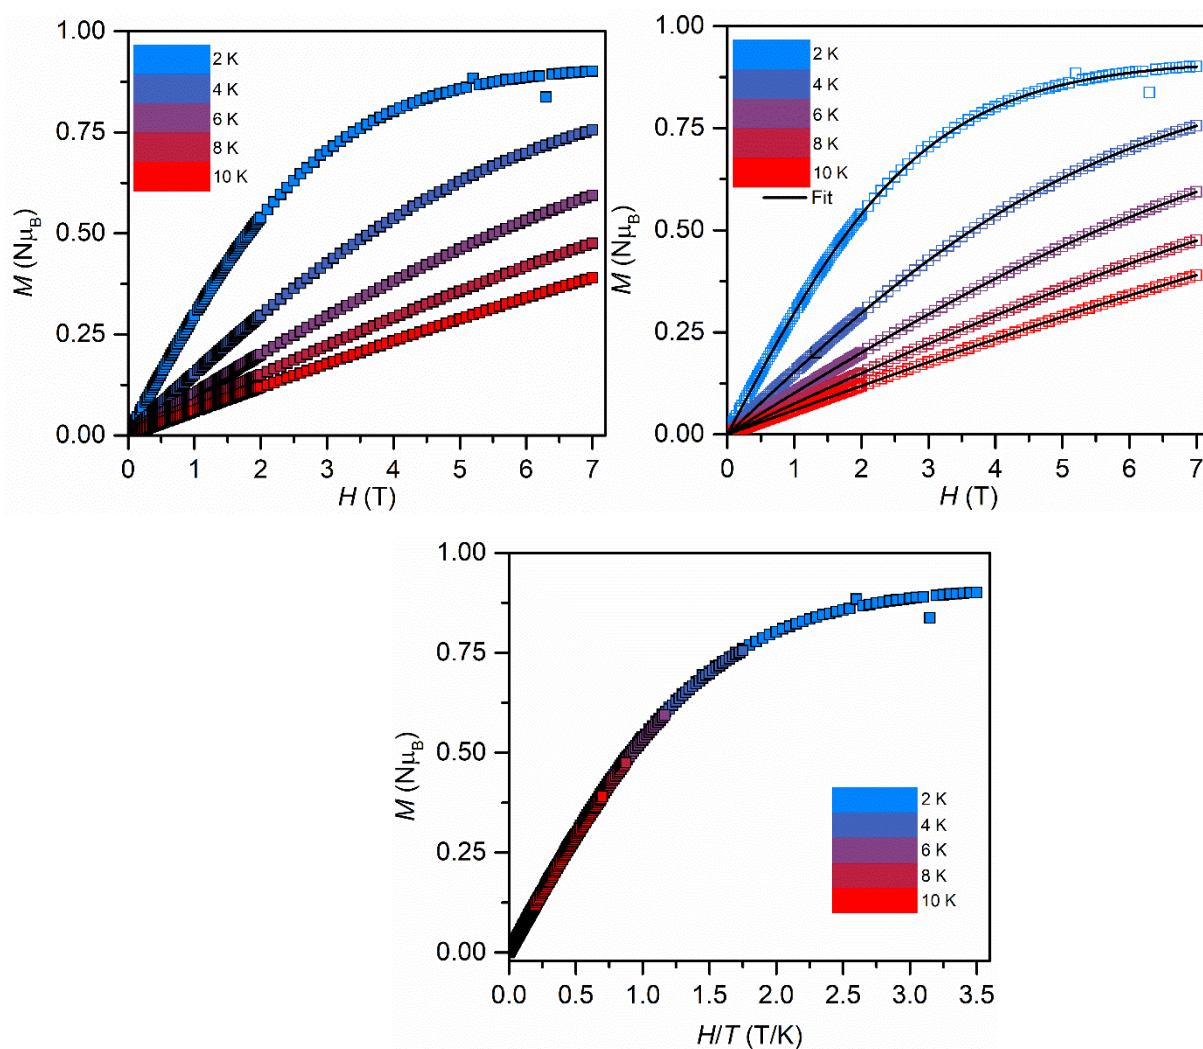

**Figure S16.** Field-dependent magnetization ( $M$  vs.  $H$ ) data (top, left) with the corresponding fit to a Brillouin function (top, right) and reduced magnetization ( $H/T$ ) data (bottom) for  $[\text{K}(\text{crypt-222})][(\text{Cp}^*_2\text{Y})_2(\mu\text{-Bbim}^*)]$ , **2**, collected from 2 K (blue squares) to 10 K (red squares) in 2 K increments and under fields of 0 to 7 T. The reduced magnetization plot reveals that all measured magnetization curves superimpose to one single curve as expected for an organic radical with negligible magnetic anisotropy.

**Table S5.**  $g$ -Values and number of moments ( $N$ ) obtained from fitting the  $M$  vs.  $H$  data to a Brillouin function with squared errors ( $R^2$ ) as a measure for the goodness of the fits. The total angular momentum quantum number  $J$  was set to  $\frac{1}{2}$  for one unpaired electron. The field dependence of the magnetization is well-described by the Brillouin function for all probed temperatures. From these fits,  $N$  values were found to range between 0.89 and 0.91, indicating that approximately 90% of the non-interacting radical spins contribute to the Curie-Weiss susceptibility within the investigated temperature range.

| Temperature (K) | $g$        | $N$        | $R^2$   |
|-----------------|------------|------------|---------|
| 2               | 2.0069(55) | 0.9135(36) | 0.99974 |
| 4               | 2.0078(10) | 0.9090(8)  | 0.99999 |
| 6               | 2.0108(15) | 0.8981(12) | 0.99999 |
| 8               | 2.0023(28) | 0.8964(24) | 0.99999 |
| 10              | 2.0037(33) | 0.8858(28) | 0.99999 |

## 1.6 IR Spectroscopy

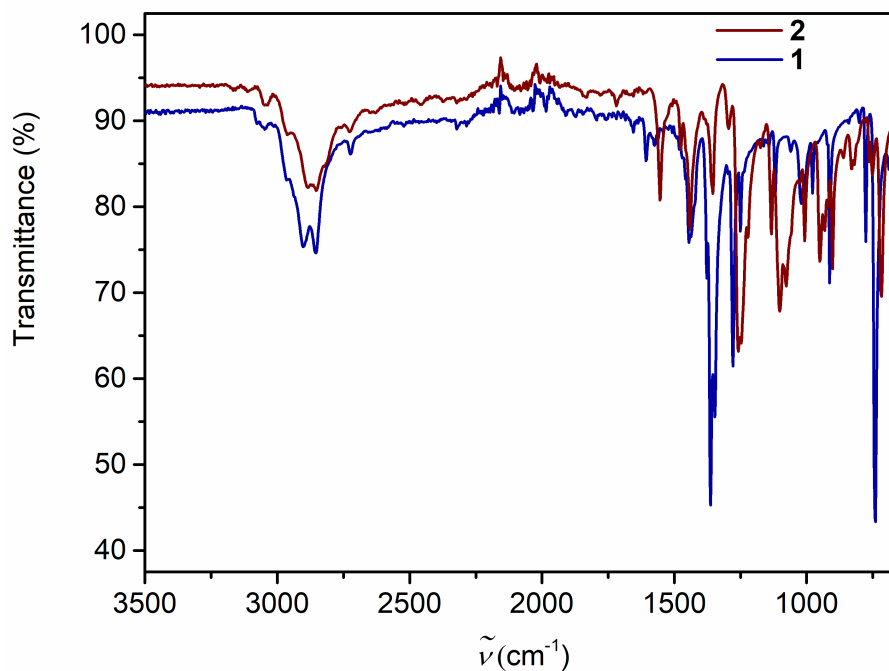

**Figure S17.** FTIR spectra of  $(\text{Cp}^*_2\text{Y})_2(\mu\text{-Bbim})$ , **1** (dark blue) and  $[\text{K}(\text{crypt-222})][(\text{Cp}^*_2\text{Y})_2(\mu\text{-Bbim}^*)]$ , **2**, (dark red).



## 1.7 Cyclic Voltammetry

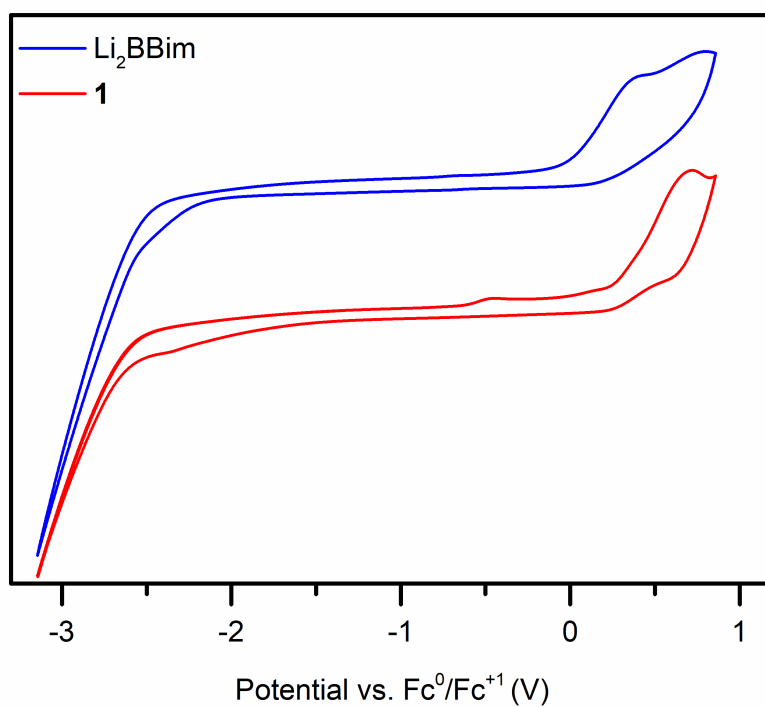

**Figure S18.** Cyclic voltammogram of the free ligand (Li(TMEDA))<sub>2</sub>Bbim (blue) and (Cp\*<sub>2</sub>Y)<sub>2</sub>(μ-Bbim), **1**, (red) in dichloromethane.

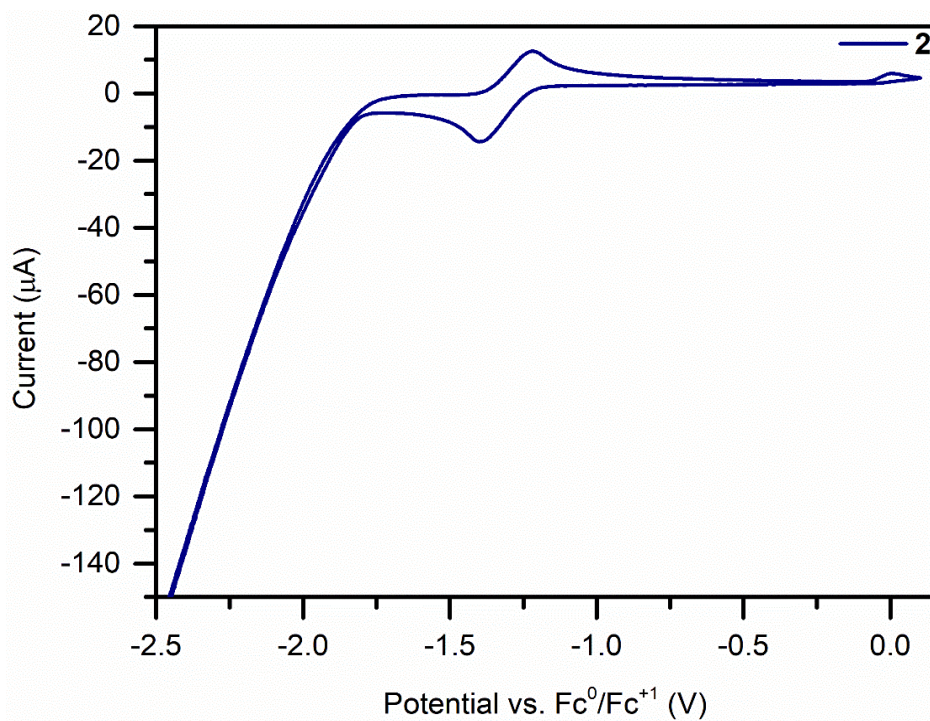

**Figure S19.** Full cyclic voltammogram of [K(crypt-222)][(Cp\*<sub>2</sub>Y)<sub>2</sub>(μ-Bbim\*)], **2**, measured in THF. Magnification is depicted in Figure 6 in the main text.

## 1.8 DFT calculations

As described in the main text, structural optimizations were carried on a simplified model of **2** where all Cp\* methyl groups were substituted by H atoms (herein called **2'**). In comparison to the initial structure obtained from single crystal X-ray analysis, the DFT methods predict a slightly differing conformation of the bridging Bbim<sup>3-</sup>, presumably due to the reduced steric interaction imposed upon truncation in **2'** (Fig S21). With respect to the truncations imposed on **2'** the structural comparison (Tables S6 and S7) is limited to the Bbim and Y interactions while the inner Cp C–C distances and -angles were not further analysed. The deployed approximations for the model complex evoked a slight displacement of the Y atoms below the Bbim plane, affording a “boat” conformation in the optimized structures and deviating from the zig-zag conformation uncovered by the crystal structure. This is also reflected in shortened Y1–Y2 distances (0.195–0.212 Å). These effects may be rationalized by the increased steric hinderance caused by the Cp\* rings in **2** compared to the Cp moieties in **2'**, which also allows for closer proximity of the Cp ligands to the metal centres. To further validate the electronic structure of the optimized structures single point calculations were additionally carried out on the unoptimized heavy atom coordinates of **2'** as obtained from the crystal structure of **2** after replacing the Cp methyl groups by protons. In comparison to the nitrogen lone pair (LP) contributions obtained for the optimized structures the NLMO analysis of the unoptimized structures shows very comparable orbital contributions to the Y–interacting nitrogen LPs (Tables S13 and S14), further suggesting a negligible influence of the Cp\* methyl groups to the Y–Bbim bonding. Lastly, in comparison to the hyperfine coupling parameters utilized for the simulation of the EPR spectra, DFT seems slightly overestimated the spin density delocalized onto the yttrium atoms, which might also be a consequence of the shorter calculated Y–N distances (0.0152–0.0184 Å).

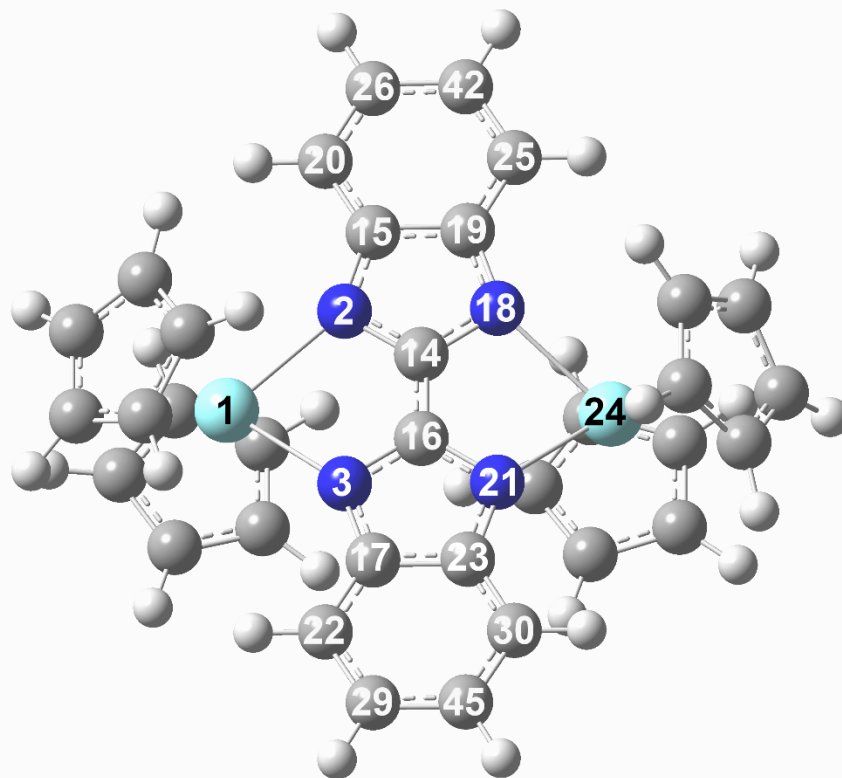

**Figure S20.** Numbering scheme as employed in structure optimizations and NLMO/spin density calculations.

**Table S6.** Structural parameters of the optimized geometries of **2'** in comparison to the experimental values for **2** as obtained from single-crystal X-ray crystallography. Positive signs represent longer calculated and negative values shorter calculated values compared to the experimental values. The highlighted cells in green represent the smallest deviation between experimental and calculated values while blue highlights the largest deviations.

| Experimental Values |                   | Calculated    |                |               |                |
|---------------------|-------------------|---------------|----------------|---------------|----------------|
| Atoms               | Distance (Å)      | uTPSS         |                | uB3LYP        |                |
|                     |                   | Distance (Å)  | Difference     | Distance (Å)  | Difference     |
| Y1-N2               | 2.3550(17)        | 2.3492        | -0.0058        | 2.3436        | -0.0114        |
| Y1-N3               | 2.3639(18)        | 2.3492        | -0.0147        | 2.3436        | -0.0203        |
| Y24-N10             | 2.3739(18)        | 2.3461        | -0.0278        | 2.3454        | -0.0285        |
| Y24-N21             | 2.3586(17)        | 2.3461        | -0.0125        | 2.3454        | -0.0132        |
| <b>Avg. Y-N</b>     | <b>2.3629(17)</b> | <b>2.3477</b> | <b>-0.0152</b> | <b>2.3455</b> | <b>-0.0184</b> |
| N2-C14              | 1.3838(27)        | 1.3810        | -0.0007        | 1.3804        | -0.0034        |
| C14-N18             | 1.3812(26)        | 1.3791        | 0.0035         | 1.3796        | -0.0016        |
| <b>Avg. C14-N</b>   | <b>1.3825(27)</b> | <b>1.3839</b> | <b>0.0014</b>  | <b>1.3800</b> | <b>-0.0025</b> |
| N3-C16              | 1.3838(26)        | 1.3831        | -0.0007        | 1.3804        | -0.0034        |
| C16-N21             | 1.3813(27)        | 1.3847        | 0.0034         | 1.3796        | -0.0017        |
| <b>Avg. C15-N</b>   | <b>1.3826(27)</b> | <b>1.3839</b> | <b>0.0014</b>  | <b>1.3800</b> | <b>-0.0025</b> |
| N18-C19             | 1.3847(25)        | 1.3830        | -0.0017        | 1.3781        | -0.0066        |
| C19-C25             | 1.3942(27)        | 1.4064        | 0.0122         | 1.4005        | 0.0063         |
| C25-C42             | 1.4019(30)        | 1.4103        | 0.0084         | 1.4066        | 0.0047         |
| C42-C26             | 1.3894(32)        | 1.4094        | 0.0200         | 1.4037        | 0.0143         |
| C26-C20             | 1.3988(29)        | 1.4102        | 0.0114         | 1.4065        | 0.0077         |
| C20-C15             | 1.4012(28)        | 1.4064        | 0.0052         | 1.4005        | -0.0007        |
| C15-C19             | 1.4276(30)        | 1.4396        | 0.0120         | 1.4358        | 0.0082         |
| C15-N2              | 1.3768(24)        | 1.3831        | 0.0063         | 1.3780        | 0.0012         |
| N3-C17              | 1.3824(26)        | 1.3831        | 0.0007         | 1.3780        | -0.0044        |
| C17-C22             | 1.3910(28)        | 1.4064        | 0.0154         | 1.4005        | 0.0095         |
| C22-C29             | 1.4005(32)        | 1.4102        | 0.0097         | 1.4065        | 0.0060         |
| C29-C45             | 1.3921(33)        | 1.4094        | 0.0173         | 1.4037        | 0.0116         |
| C45-C30             | 1.4014(29)        | 1.4103        | 0.0089         | 1.4066        | 0.0052         |
| C30-C23             | 1.3937(29)        | 1.4064        | 0.0127         | 1.4005        | 0.0068         |
| C23-C17             | 1.4283(29)        | 1.4396        | 0.0113         | 1.4358        | 0.0075         |
| C12-N21             | 1.3804(24)        | 1.3830        | 0.0026         | 1.3781        | -0.0023        |
| <b>C14-C15</b>      | <b>1.4024(26)</b> | <b>1.4178</b> | <b>0.0154</b>  | <b>1.4105</b> | <b>0.0081</b>  |
| <b>Y-Y distance</b> | <b>6.030(5)</b>   | <b>5.8345</b> | <b>-0.1954</b> | <b>5.8128</b> | <b>-0.2171</b> |

**Table S7.** Bond- and dihedral angles of the optimized geometries of **2'** in comparison to the experimental values for **2** as obtained from single-crystal X-ray diffraction. Positive signs represent longer calculated and negative values shorter calculated values compared to the experimental values. The highlighted cells in green represent the smallest deviation between experimental and calculated values while blue highlights the largest deviations.

| Experimental Values            |              | Calculated |            |           |            |
|--------------------------------|--------------|------------|------------|-----------|------------|
| Atoms                          | Angle (°)    | uTPSS      |            | uB3LYP    |            |
|                                |              | Value (°)  | Difference | Value (°) | Difference |
| N3-Y1-N2                       | 75.874(60)   | 77.1250    | 1.2510     | 76.8840   | 1.0100     |
| N18-Y24-N21                    | 75.682(59)   | 76.8720    | 1.1900     | 77.0418   | 1.3598     |
| <b>Avg. N-Y-N</b>              | 75.778(60)   | 76.9985    | 1.2205     | 76.9629   | 1.1849     |
| Y1-N2-N21-Y24                  | 176.760(58)  | 153.2340   | -23.5260   | 152.7840  | -23.9760   |
| Y1-N3-N18-Y24                  | 175.17(59)   | 153.2340   | -21.9360   | 158.7870  | -16.3830   |
| <b>Avg. diagonal bending</b>   | 175.965(59)  | 153.2340   | -22.7310   | 155.7855  | -20.1795   |
| Y1-N2-N18-Y24                  | 26.471(228)  | 4.8614     | -21.6096   | 2.378     | -24.0930   |
| Y1-N3-N21-Y24                  | 20.044(237)  | 4.8612     | -15.1828   | 2.344     | -17.7000   |
| <b>Avg. axial bending</b>      | 23.2575(233) | 4.8613     | -18.3962   | 2.3610    | -20.8965   |
| Tilt angle BBim benzene planes | 3.118(66)    | Planar     | 3.118      | Planar    | 3.118      |

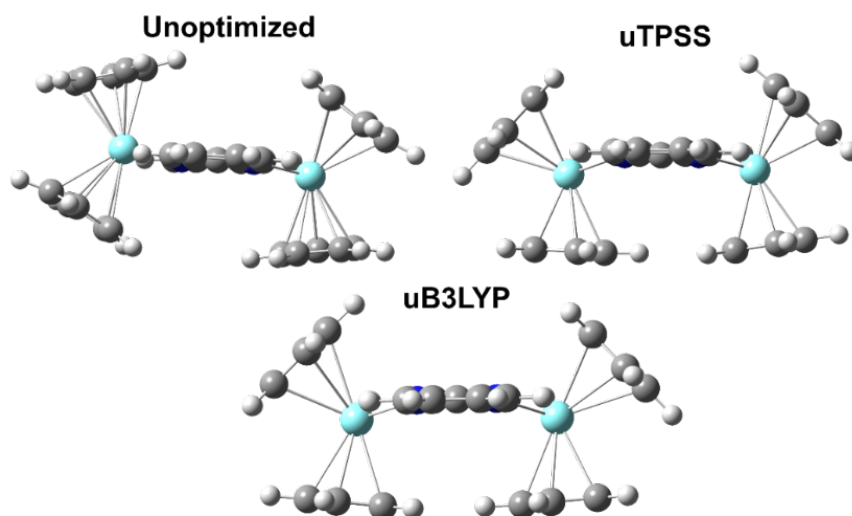

**Figure S21.** Graphical representation of the DFT optimized structures in comparison to the unoptimized structure (with Me for H substituted, all other coordinates are as obtained from single-crystal X-ray analysis). The energy minimization led to a “boat”-like conformation for each functional, presumably due to reduced steric interaction of the Cp substituents.

**Table S8.** Results of the hybridization/polarization analysis of NLMOs, given as the % contributions of parent NBOs from uB3LYP calculations.

| NLMO No. | Description | NLMO contributions $\alpha$ manifold |      |       | NLMO No. | Description | NLMO contributions $\beta$ manifold |      |       |
|----------|-------------|--------------------------------------|------|-------|----------|-------------|-------------------------------------|------|-------|
|          |             | Y1                                   | Y24  | N     |          |             | Y1                                  | Y24  | N     |
| 47       | LP1 N2      | 7.29                                 | 0.06 | 90.38 | 47       | LP1 N2      | 7.43                                | 0.06 | 90.27 |
| 48       | LP2 N2      | 2.19                                 | 0.32 | 78.38 | 48       | LP1 N3      | 7.42                                | 0.06 | 90.28 |
| 49       | LP1 N3      | 7.22                                 | 0.06 | 90.41 | 51       | LP1 N18     | 0.06                                | 7.38 | 90.27 |
| 50       | LP2 N3      | 2.23                                 | 0.33 | 78.41 | 53       | LP1 N21     | 0.06                                | 7.38 | 90.26 |
| 53       | LP1 N18     | 0.07                                 | 7.24 | 90.43 |          |             |                                     |      |       |
| 54       | LP2 N18     | 0.25                                 | 2.35 | 77.59 |          |             |                                     |      |       |
| 55       | LP1 N21     | 0.07                                 | 7.23 | 90.43 |          |             |                                     |      |       |
| 56       | LP2 N21     | 0.24                                 | 2.32 | 77.58 |          |             |                                     |      |       |

**Table S9.** Results of the second order perturbation analysis of  $2'$  from uB3LYP calculations. Only strongest interactions are shown (> 3 kcal/mol). Highlighted values show a significant discrepancy between  $\alpha$ - and  $\beta$ -manifolds..

| Donor NBO | Acceptor NBO | E (kcal/mol) $\alpha$ manifold | E (kcal/mol) $\beta$ manifold |
|-----------|--------------|--------------------------------|-------------------------------|
| LP1 N2    | LV1 Y1       | 15.44                          | 15.96                         |
| LP2 N2    | LV2 Y1       | 17.37                          | 17.67                         |
| LP1 N2    | LV5 Y1       | 18.88                          | 19.11                         |
| LP1 N2    | LV6 Y1       | 8.68                           | 1.20                          |
| LP2 N2    | LV4 Y1       | 4.25                           | -                             |
| LP1 N3    | LV1 Y1       | 15.45                          | 15.98                         |
| LP1 N3    | LV2 Y1       | 17.36                          | 17.64                         |
| LP1 N3    | LV5 Y1       | 18.88                          | 19.11                         |
| LP1 N3    | LV6 Y1       | 8.68                           | 1.20                          |
| LP1 N18   | LV1 Y24      | 15.58                          | 15.77                         |
| LP1 N18   | LV2 Y24      | 16.90                          | 17.37                         |
| LP1 N18   | LV5 Y24      | 18.99                          | 19.33                         |
| LP1 N18   | LV6 Y24      | 12.30                          | 1.23                          |
| LP2 N18   | LV4 Y24      | 4.50                           | -                             |
| LP1 N21   | LV1 Y24      | 15.58                          | 15.77                         |
| LP1 N21   | LV2 Y24      | 16.91                          | 17.37                         |
| LP1 N21   | LV5 Y24      | 18.99                          | 19.33                         |
| LP1 N21   | LV6 Y24      | 12.30                          | 1.23                          |
| LP2 N21   | LV4 Y24      | 4.50                           | -                             |

**Table S10.** Results of the hybridization/polarization analysis of NLMOs, given as the % contributions of parent NBOs from uTPSS calculations.

| NLMO No. | Description | NLMO contributions $\alpha$ manifold |      |       | NLMO No. | Description | NLMO contributions $\beta$ manifold |      |       |
|----------|-------------|--------------------------------------|------|-------|----------|-------------|-------------------------------------|------|-------|
|          |             | Y1                                   | Y24  | N     |          |             | Y1                                  | Y24  | N     |
| 47       | LP1 N2      | 7.72                                 | 0.07 | 89.84 | 47       | LP1 N2      | 7.80                                | 0.06 | 89.78 |
| 48       | LP2 N2      | 2.35                                 | 0.54 | 76.55 | 48       | LP1 N3      | 7.79                                | 0.06 | 89.79 |
| 49       | LP1 N3      | 7.72                                 | 0.08 | 89.84 | 51       | LP1 N18     | 0.07                                | 7.70 | 89.79 |
| 50       | LP2 N3      | 2.413                                | 0.56 | 76.57 | 53       | LP1 N21     | 0.07                                | 7.70 | 89.79 |
| 53       | LP1 N18     | 0.09                                 | 7.60 | 89.85 |          |             |                                     |      |       |
| 54       | LP2 N18     | 0.39                                 | 2.80 | 75.48 |          |             |                                     |      |       |
| 55       | LP1 N21     | 0.09                                 | 7.63 | 89.85 |          |             |                                     |      |       |
| 56       | LP2 N21     | 0.37                                 | 2.76 | 75.47 |          |             |                                     |      |       |

**Table S11.** Results of the second order perturbation analysis of  $2'$  from uTPSS calculations. Only strongest interactions are shown (> 3 kcal/mol). Highlighted values show a significant discrepancy between  $\alpha$ - and  $\beta$ -manifolds..

| Donor NBO | Acceptor NBO | E (kcal/mol) $\alpha$ manifold | E (kcal/mol) $\beta$ manifold |
|-----------|--------------|--------------------------------|-------------------------------|
| LP1 N2    | LV1 Y1       | 13.96                          | 13.81                         |
| LP2 N2    | LV2 Y1       | 16.86                          | 17.00                         |
| LP1 N2    | LV5 Y1       | 19.49                          | 19.43                         |
| LP1 N2    | LV6 Y1       | 13.66                          | 1.26                          |
| LP2 N2    | LV4 Y1       | 4.19                           | -                             |
| LP1 N3    | LV1 Y1       | 13.96                          | 13.81                         |
| LP1 N3    | LV2 Y1       | 16.86                          | 17.00                         |
| LP1 N3    | LV5 Y1       | 19.49                          | 19.43                         |
| LP1 N3    | LV6 Y1       | 13.66                          | 1.26                          |
| LP2 N3    | LV4 Y1       | 4.19                           | -                             |
| LP1 N18   | LV1 Y24      | 13.84                          | 13.04                         |
| LP1 N18   | LV2 Y24      | 15.92                          | 16.58                         |
| LP1 N18   | LV5 Y24      | 15.13                          | 19.40                         |
| LP1 N18   | LV6 Y24      | 18.04                          | 1.24                          |
| LP2 N18   | LV3 Y24      | 4.30                           | -                             |
| LP1 N21   | LV1 Y24      | 13.84                          | 13.04                         |
| LP1 N21   | LV2 Y24      | 15.92                          | 16.58                         |
| LP1 N21   | LV5 Y24      | 15.13                          | 19.40                         |
| LP1 N21   | LV6 Y24      | 18.04                          | 1.24                          |
| LP2 N21   | LV3 Y24      | 4.30                           | -                             |

**Table S12.** Mulliken spin densities for **2'** with hydrogens summed into heavy atoms as obtained from NLMO calculations. The central atoms of the Bbm<sup>3-</sup> moiety were highlighted in green.

| Atom | uTPSS     | uB3LYP    |
|------|-----------|-----------|
| Y1   | 0.054109  | 0.034287  |
| N2   | 0.076381  | 0.090889  |
| N3   | 0.076381  | 0.090890  |
| C14  | 0.141857  | 0.157802  |
| C15  | -0.020075 | -0.027685 |
| C16  | 0.141857  | 0.157802  |
| C17  | -0.020075 | -0.027684 |
| N18  | 0.073368  | 0.089050  |
| C19  | -0.020381 | -0.027935 |
| C20  | 0.06617   | 0.067739  |
| N21  | 0.073367  | 0.089049  |
| C22  | 0.066117  | 0.067737  |
| C23  | -0.020381 | -0.027936 |
| Y24  | 0.079187  | 0.044648  |
| C25  | 0.067251  | 0.068104  |
| C26  | 0.018159  | 0.016672  |
| C29  | 0.018159  | 0.016673  |
| C30  | 0.067251  | 0.068105  |
| C42  | 0.016123  | 0.015901  |
| C45  | 0.016123  | 0.015899  |

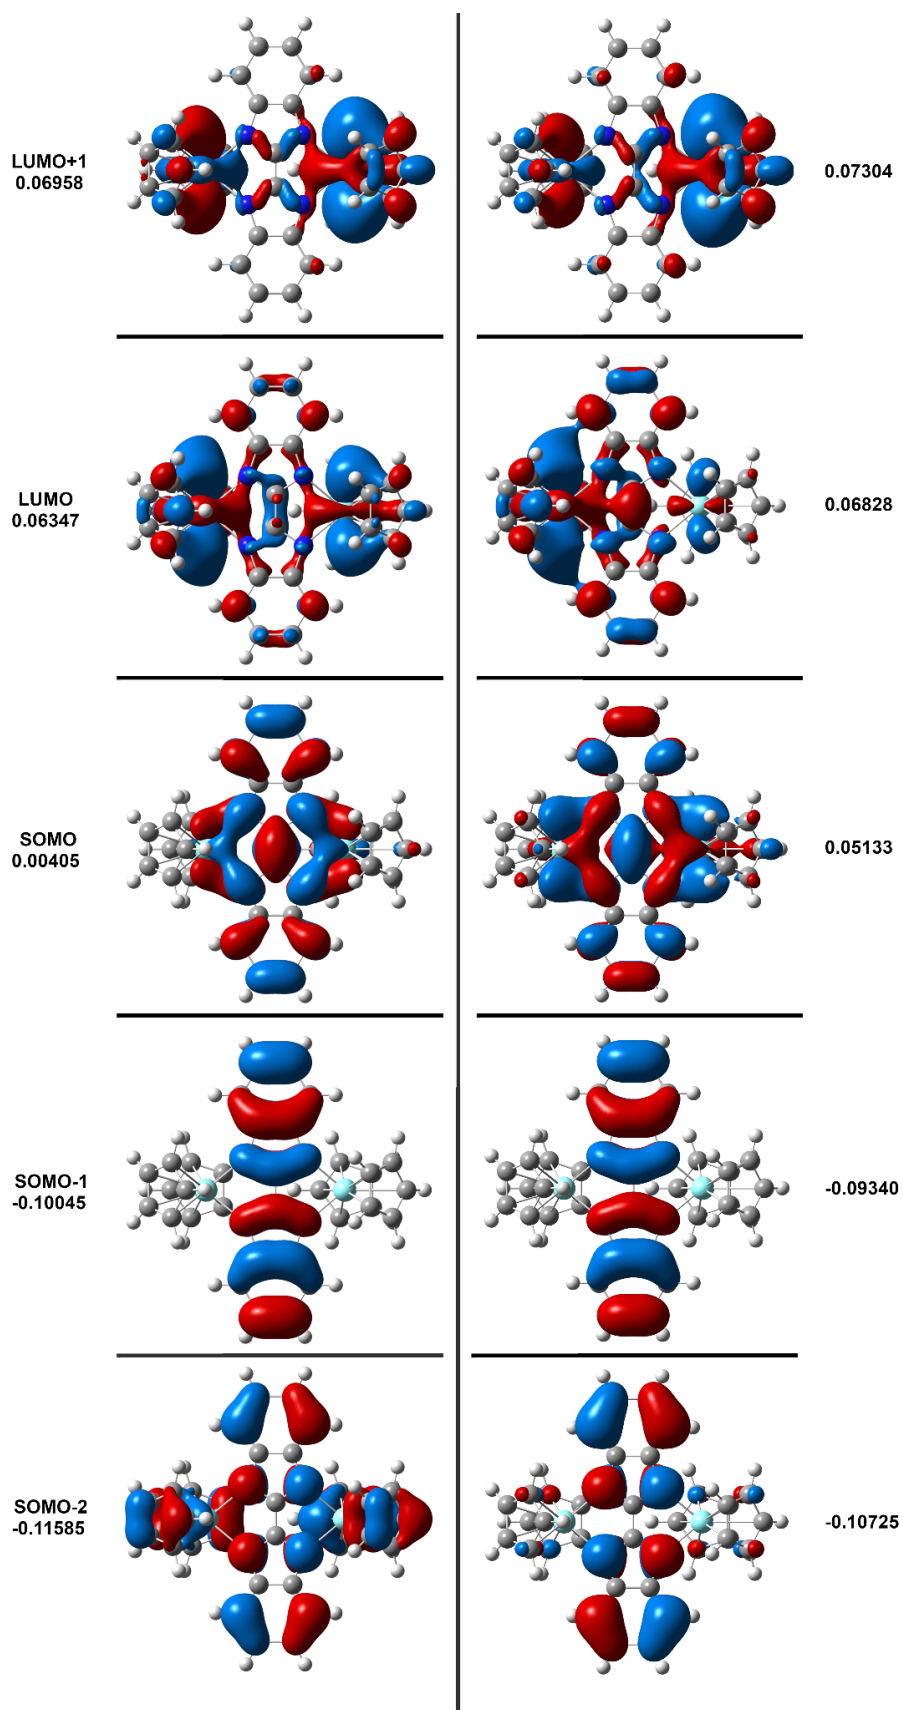

**Figure S22.** Graphical representation of the calculated B3LYP MOs of the  $\alpha$ - (left) and  $\beta$ -manifold (right), sorted by their relative energies.



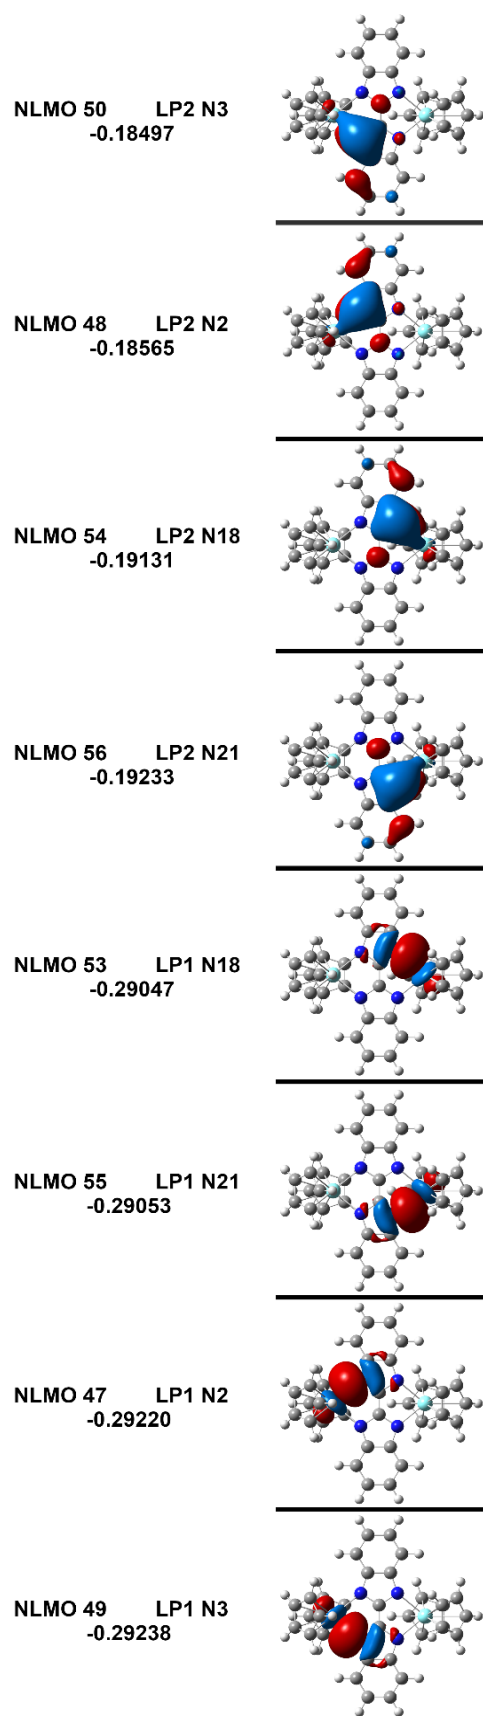

**Figure S23.** Graphical representation of the calculated B3LYP N lone pair NLMOs, sorted by their relative energies.

**Table S13.** Results of the hybridization/polarization analysis of NLMOs, given as the % contributions of parent NBOs from uB3LYP calculations on the unoptimized crystal coordinates of **1'**.

| NLMO No. | Description | NLMO contributions $\alpha$ manifold |      |       | NLMO No. | Description | NLMO contributions $\beta$ manifold |      |       |
|----------|-------------|--------------------------------------|------|-------|----------|-------------|-------------------------------------|------|-------|
|          |             | Y1                                   | Y24  | N     |          |             | Y1                                  | Y24  | N     |
| 47       | LP1 N2      | 7.59                                 | 0.05 | 89.86 | 47       | LP1 N2      | 7.75                                | 0.06 | 89.68 |
| 48       | LP2 N2      | 1.58                                 | 0.24 | 78.63 | 48       | LP1 N3      | 7.91                                | 0.06 | 89.69 |
| 49       | LP1 N3      | 7.72                                 | 0.05 | 89.89 | 52       | LP1 N18     | 0.06                                | 7.61 | 89.78 |
| 50       | LP2 N3      | 1.41                                 | 0.24 | 78.13 | 54       | LP1 N21     | 0.06                                | 7.96 | 89.61 |
| 53       | LP1 N18     | 0.06                                 | 7.48 | 89.98 |          |             |                                     |      |       |
| 54       | LP2 N18     | 0.07                                 | 1.67 | 77.80 |          |             |                                     |      |       |
| 55       | LP1 N21     | 0.05                                 | 7.81 | 89.82 |          |             |                                     |      |       |
| 56       | LP2 N21     | 0.09                                 | 2.00 | 78.32 |          |             |                                     |      |       |

**Table S14.** Results of the second order perturbation analysis of **2'** from uB3LYP calculations on the unoptimized crystal coordinates of **1'**. Only strongest interactions are shown (> 3 kcal/mol). Highlighted values show a significant discrepancy between  $\alpha$ - and  $\beta$ -manifolds.

| Donor NBO | Acceptor NBO | E (kcal/mol) $\alpha$ manifold | E (kcal/mol) $\beta$ manifold |
|-----------|--------------|--------------------------------|-------------------------------|
| LP1 N2    | LV1 Y1       | 14.94                          | 16.15                         |
| LP2 N2    | LV2 Y1       | 16.80                          | 17.49                         |
| LP1 N2    | LV5 Y1       | 19.54                          | 19.92                         |
| LP1 N2    | LV6 Y1       | -                              | -                             |
| LP2 N2    | LV4 Y1       | 4.09                           | -                             |
| LP1 N3    | LV1 Y1       | 14.47                          | 15.52                         |
| LP1 N3    | LV2 Y1       | 16.45                          | 17.60                         |
| LP1 N3    | LV5 Y1       | 19.32                          | 19.67                         |
| LP1 N3    | LV6 Y1       | -                              | -                             |
| LP1 N18   | LV1 Y24      | 12.83                          | 13.79                         |
| LP1 N18   | LV2 Y24      | 14.52                          | 16.30                         |
| LP1 N18   | LV5 Y24      | 18.04                          | 18.34                         |
| LP1 N18   | LV6 Y24      | -                              | -                             |
| LP2 N18   | LV4 Y24      | 4.42                           | -                             |
| LP1 N21   | LV1 Y24      | 14.07                          | 14.83                         |
| LP1 N21   | LV2 Y24      | 17.03                          | 18.36                         |
| LP1 N21   | LV5 Y24      | 19.42                          | 19.72                         |
| LP1 N21   | LV6 Y24      | 3.34                           | -                             |
| LP2 N21   | LV4 Y24      | 3.92                           | -                             |
| LP2 N3    | LV4 Y1       | 4.33                           | -                             |

## 1.9 References

- 1 D. Small, V. Zaitsev, Y. Jung, S. V. Rosokha, M. Head-Gordon and J. K. Kochi, Intermolecular  $\pi$ -to- $\pi$  bonding between stacked aromatic dyads. Experimental and theoretical binding energies and near-IR optical transitions for phenalenyl radical/radical versus radical/cation dimerizations, *J. Am. Chem. Soc.*, 2004, **126**, 13850–13858.
- 2 Q. Xiang, J. Guo, J. Xu, S. Ding, Z. Li, G. Li, H. Phan, Y. Gu, Y. Dang, Z. Xu, Z. Gong, W. Hu, Z. Zeng, J. Wu and Z. Sun, Stable Olympicyenyl Radicals and Their  $\pi$ -Dimers, *J. Am. Chem. Soc.*, 2020, **142**, 11022–11031.
- 3 J. Lehner and S. Stoll, Modeling of motional EPR spectra using hindered Brownian rotational diffusion and the stochastic Liouville equation, *J. Chem. Phys.*, **152**, 094103 1-13.
- 4 D. E. Budil, CW-EPR Spectral Simulations: Slow-Motion Regime, in: *Methods in Enzymology*, Elsevier Inc., 1st edn., 2015, **563**, 143-170.
- 5 A. Sengupta and K. RM, Electron Paramagnetic Resonance Spectroscopic Investigation of the Dynamics of Spin Probe in Room Temperature Ionic Liquid, *Mod. Chem. Appl.*, 2016, **4**, 1000189 1-4.
- 6 H. L. C. Feltham and S. Brooker, Review of purely  $4f$  and mixed-metal  $nd-4f$  single-molecule magnets containing only one lanthanide ion, *Coord. Chem. Rev.*, 2014, **276**, 1–33.
- 7 N. F. Chilton, R. P. Anderson, L. D. Turner, A. Soncini and K. S. Murray, PHI, *J. Comput. Chem.*, 2013, **34**, 1164–1175.
